# Supplementary material for: Duff burning from wildfires in a moist region: different impacts on PM 2.5 and Ozone
Source: Copernicus journal article supplement (doi:10.5194/acp-2021-485), 2021-08-31
Supplement: Supplementary file 3 [file acp-2021-485-supplement.pdf]

## Supplementary Materials of “Duff burning from wildfires in a moist region: different impacts on PM<sub>2.5</sub> and Ozone”

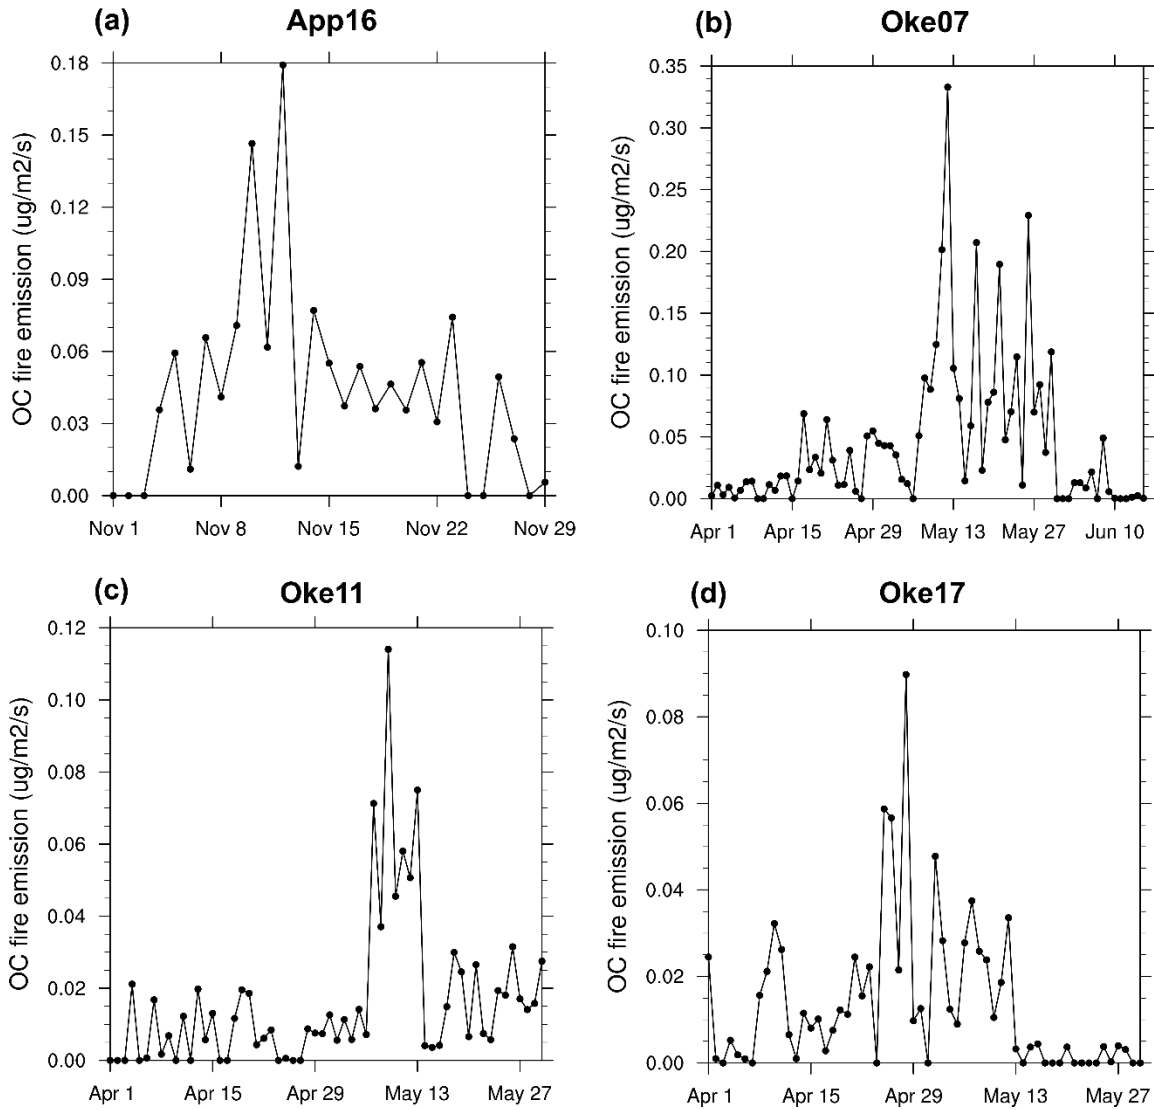

**Figure S1.** The daily trend of FINN fire emissions of organic carbon (OC) during the fire events. (a) the Southern Appalachian region (34.5° N to 36° N, 82° W to 84° W). (b) - (d) the Okefenokee region (30° N to 32° N, 81° W to 83° W).

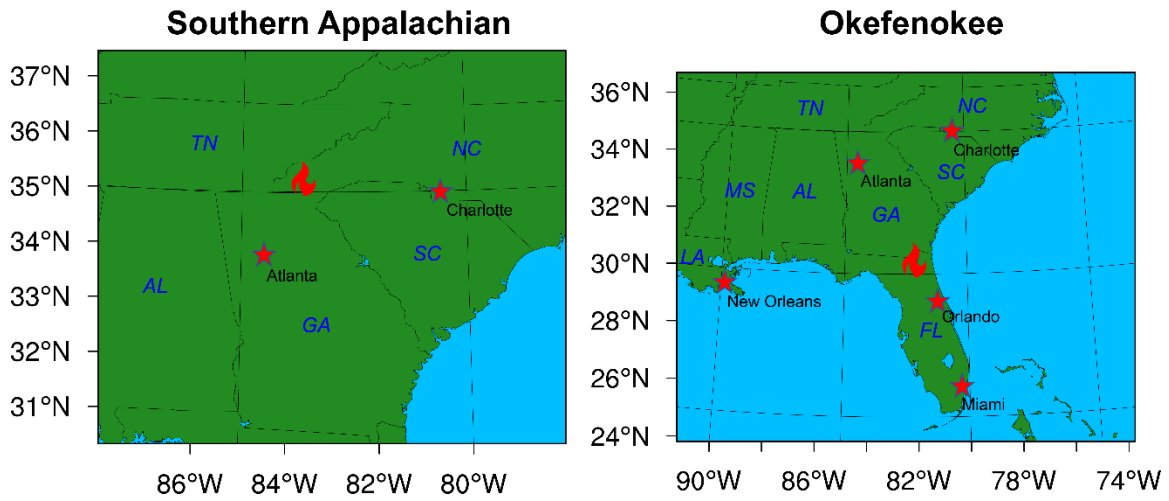

**Figure S2.** The WRF-Chem domain used in App161a (left) and the Okefenokee cases (right). The fire sites and nearby major cities are marked. The abbreviations of the US state names are Florida (FL), Alabama (AL), Georgia (GA), South Carolina (SC), North Carolina (NC), Tennessee (TN), Mississippi (MS) and Louisiana (LA).

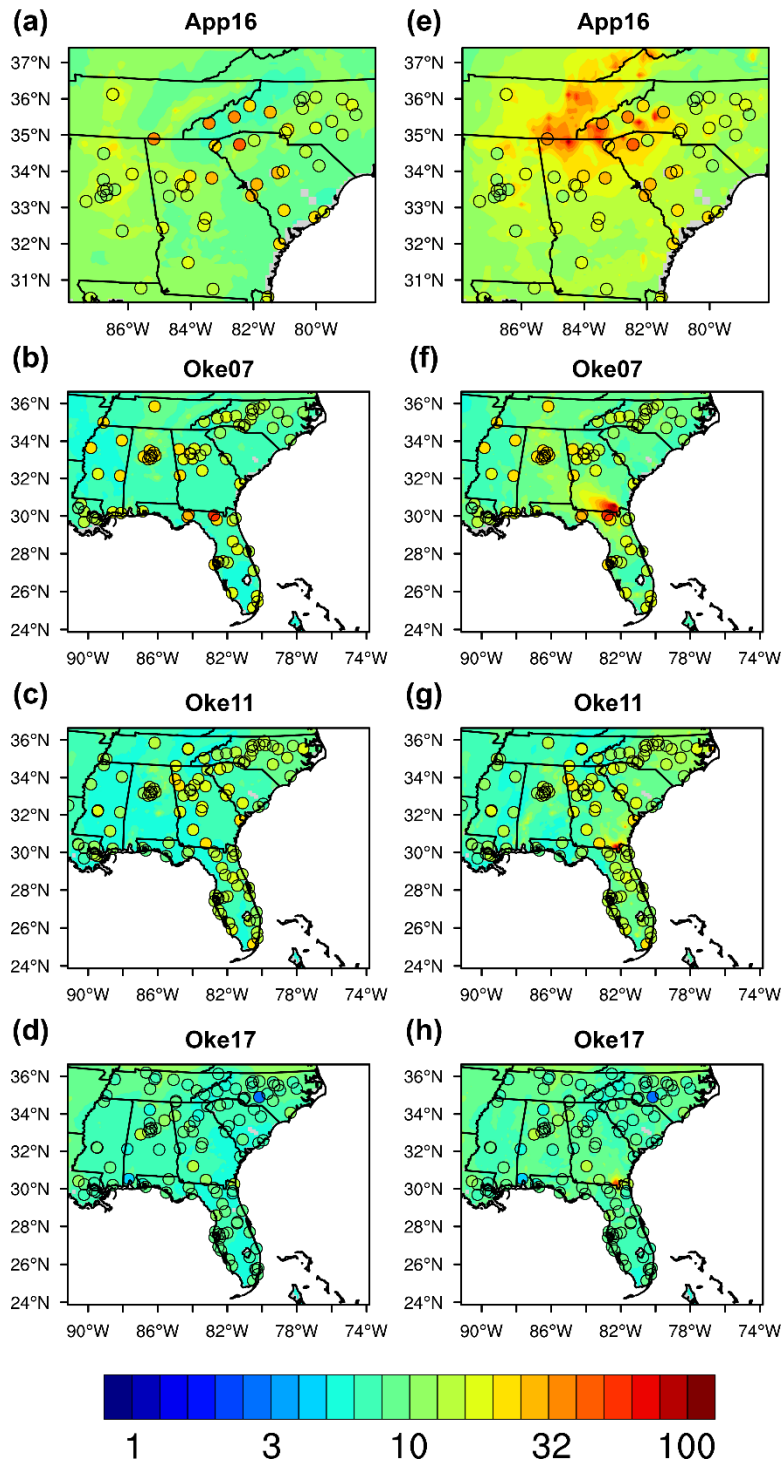

**Figure S3.** PM<sub>2.5</sub> mean surface concentration ( $\mu\text{g m}^{-3}$ ). (a) App16 (November 7-19, 2016), (b) Oke07 (May 6-30, 2007), (c) Oke11 (May 6-15, 2011), and (d) Oke17 (April 19 to May 13, 2017) for sim\_nofire. (e-h) are the corresponding fire cases for sim\_FINN. The color scatters represent the observed PM<sub>2.5</sub>.

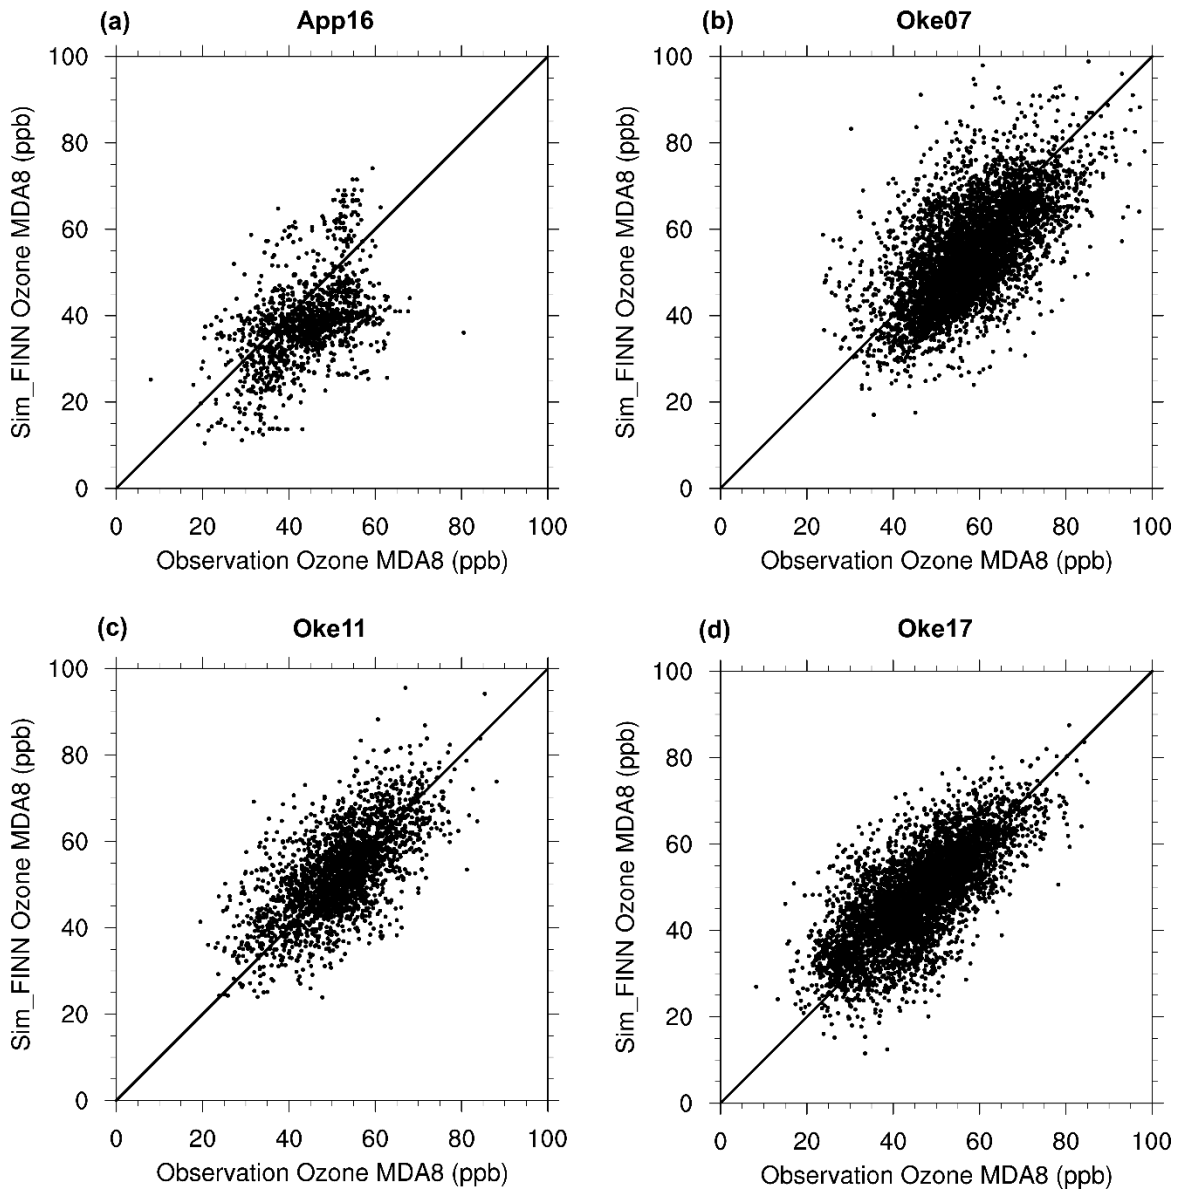

**Figure S4.** The comparison of MDA8 surface ozone concentrations between the observation and the baseline (sim\_FINN) simulations.

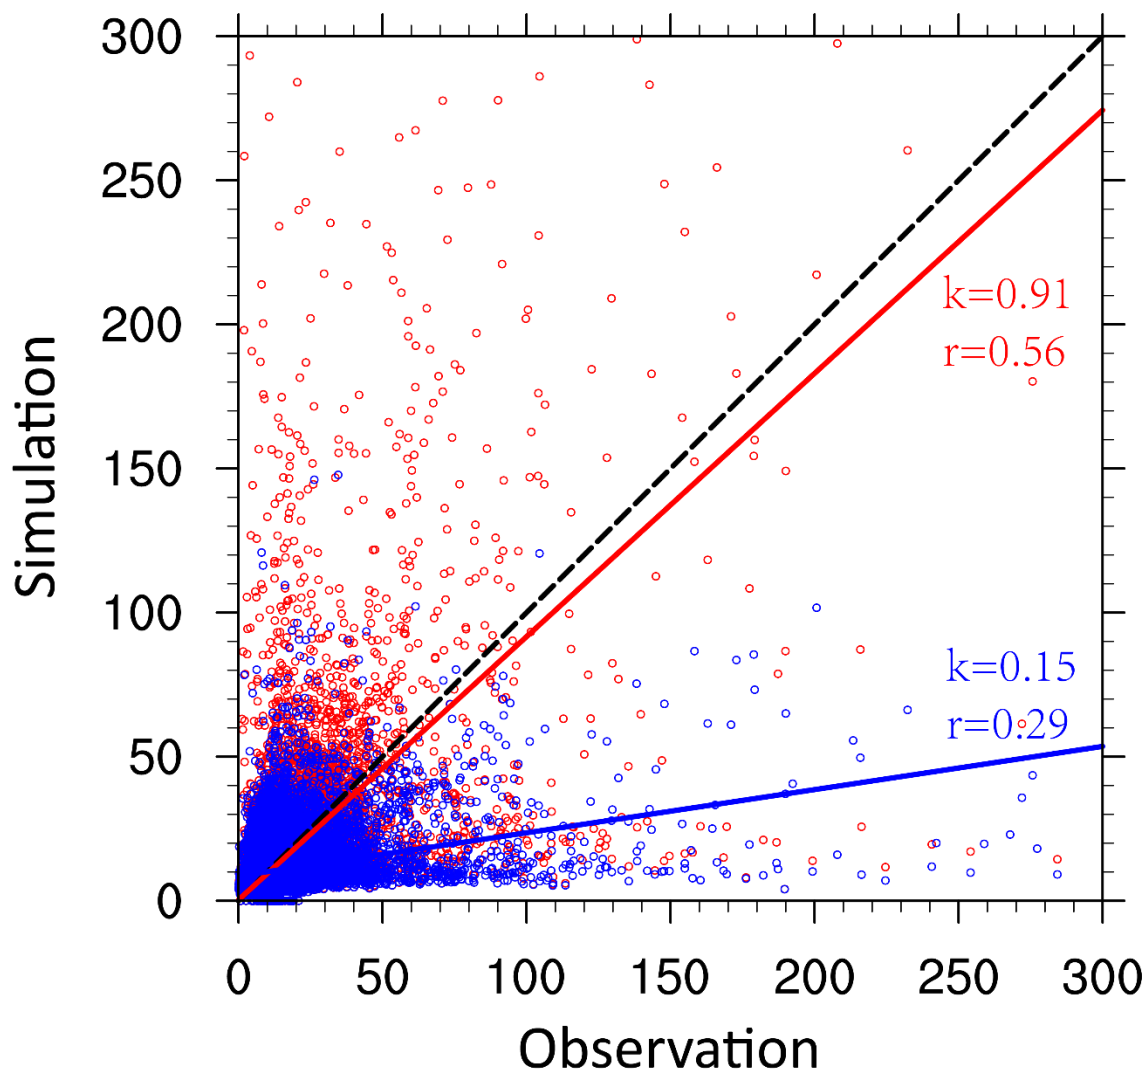

**Figure S5.** The comparison of Oke07 hourly surface  $\text{PM}_{2.5}$  concentrations between the observation, the baseline (sim\_FINN) simulations (blue), and the best (sim\_FINN+duff) simulations (red), in unit of  $\mu\text{g m}^{-3}$ . The corresponding correlation coefficient ( $r$ ) and the regression slope ( $k$ ) is enclosed.

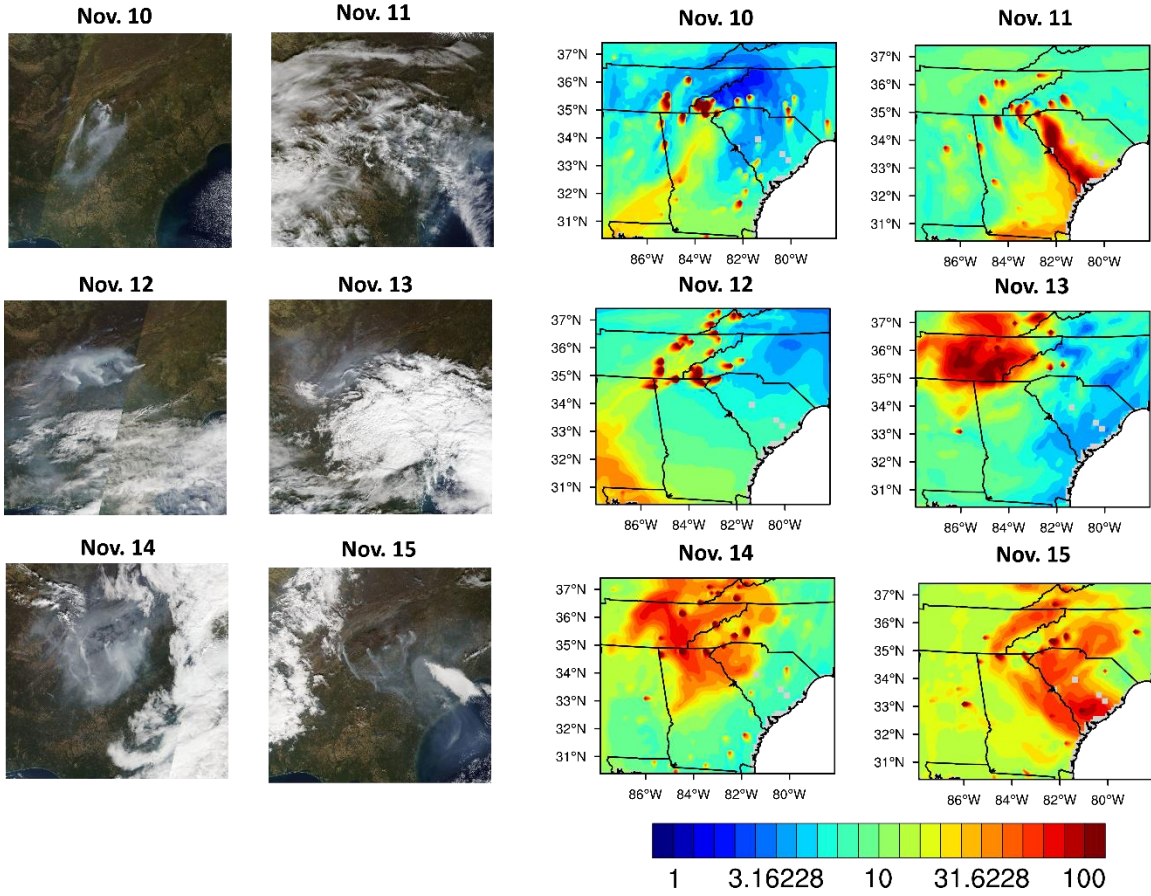

**Figure S6.** The MODIS Terra satellite image during November 10-15, 2016 over the APP16 fire compared with the corresponding surface PM<sub>2.5</sub> concentrations ( $\mu\text{g m}^{-3}$ ) simulated in the sim\_FINN+duff run at the hour of the satellite passing.

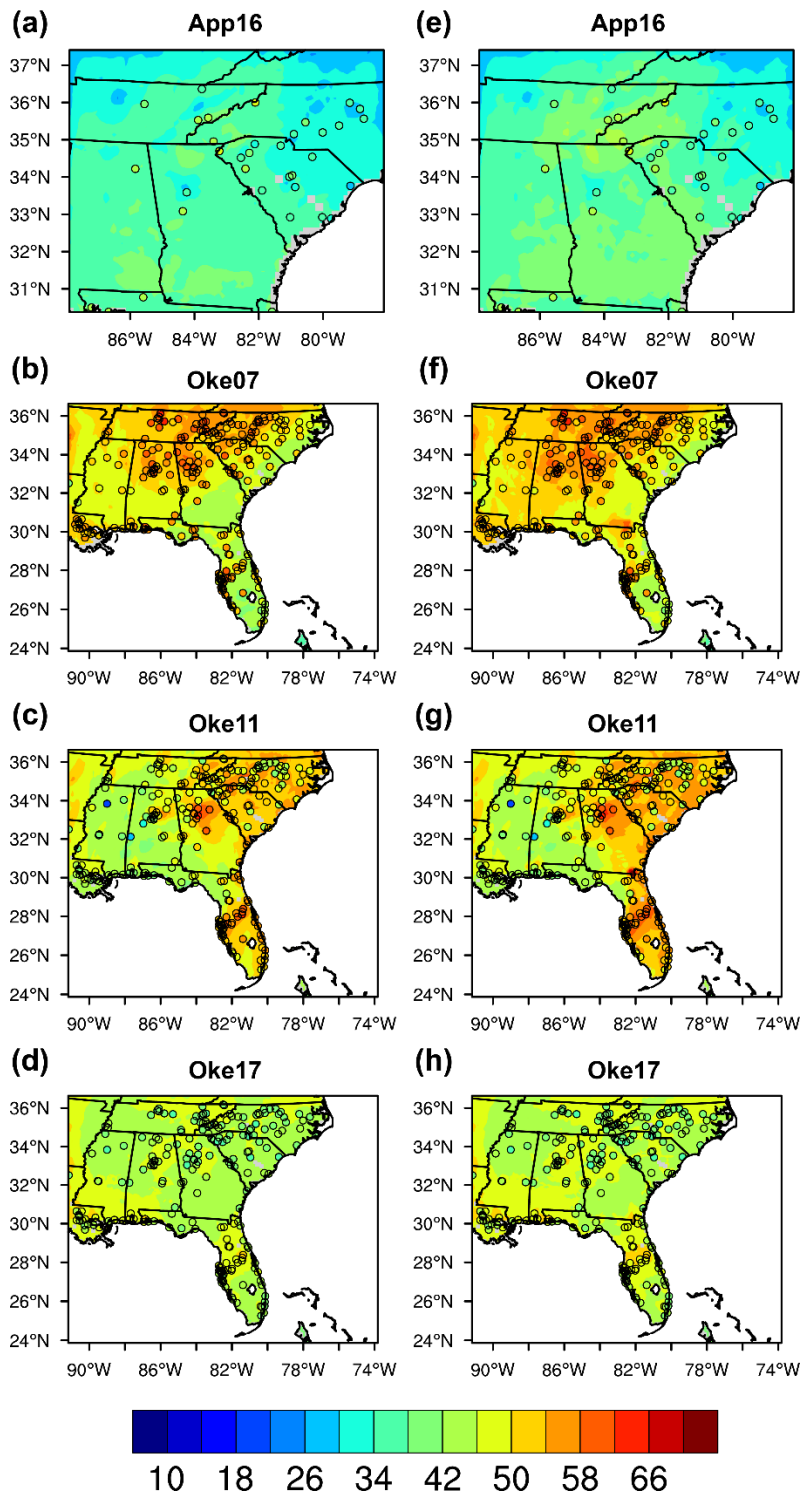

**Figure S7.** Mean day time (local time 10 am to 6 pm) ozone surface concentration (ppb). (a) App16 (November 7-19, 2016), (b) Oke07 (May 6-30, 2007), (c) Oke11 (May 6-15, 2011), and (d) Oke17 (April 19 to May 13, 2017) for sim\_nofire. (e-h) are the corresponding fire cases for sim\_FINN. The color scatters represent the observed mean day time surface ozone concentrations.

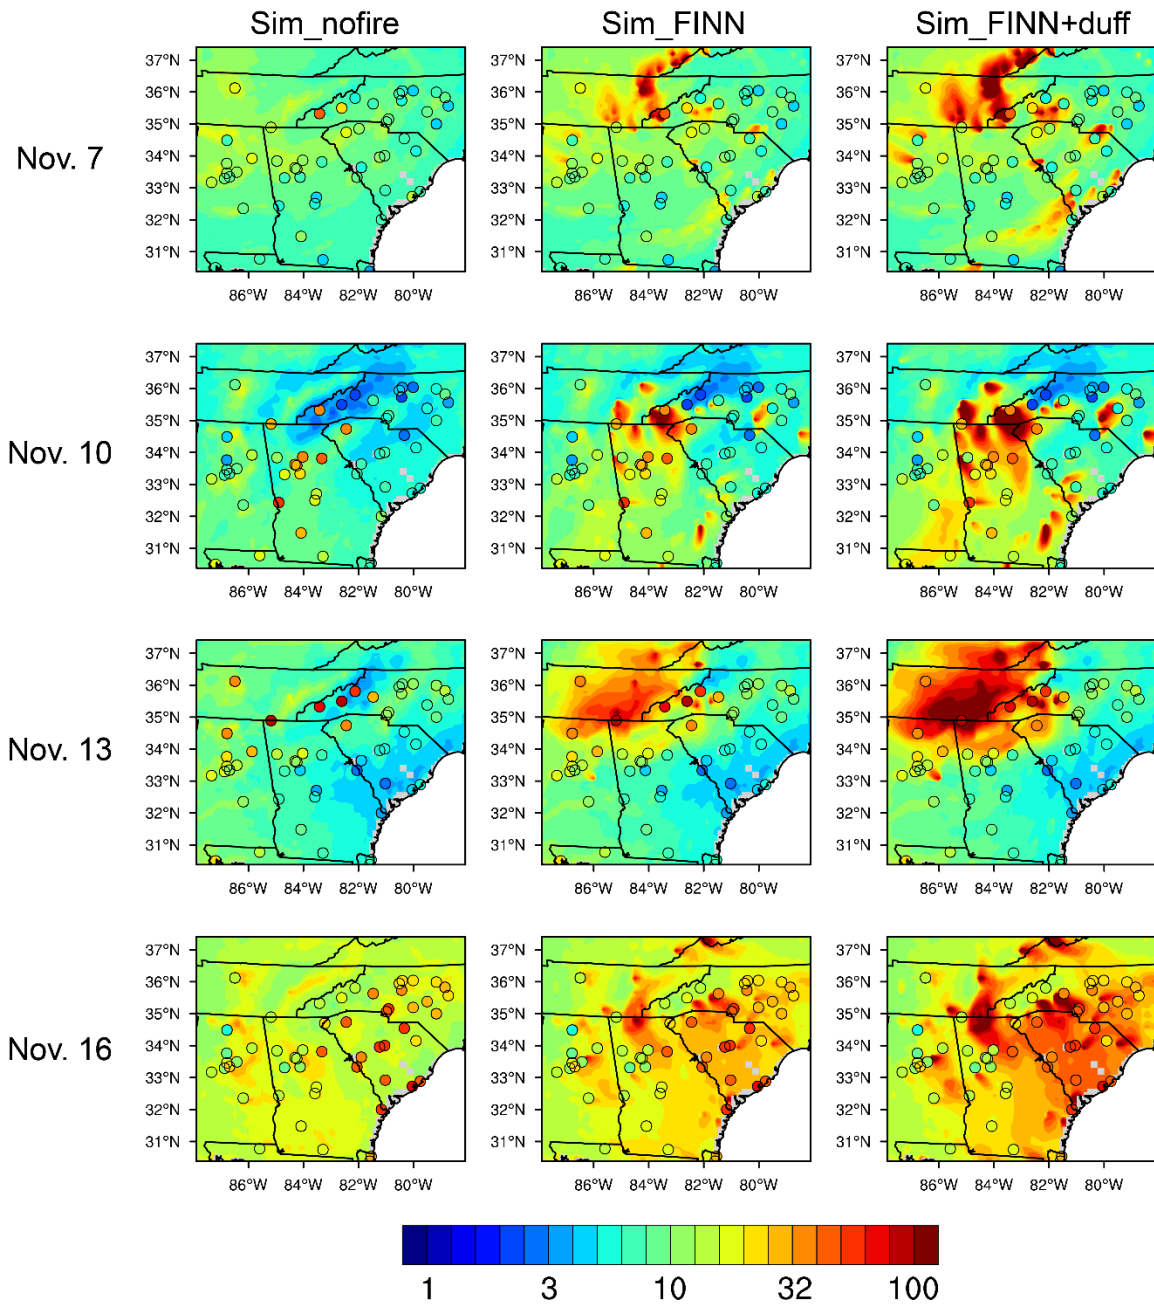

**Figure S8.** PM<sub>2.5</sub> daily mean surface concentration (µg m<sup>-3</sup>) during App16 simulated in sim\_nofire, sim\_FINN and sim\_FINN+duff runs. The colored scatters represent the corresponding observed PM<sub>2.5</sub> daily mean surface concentrations during the fire event.



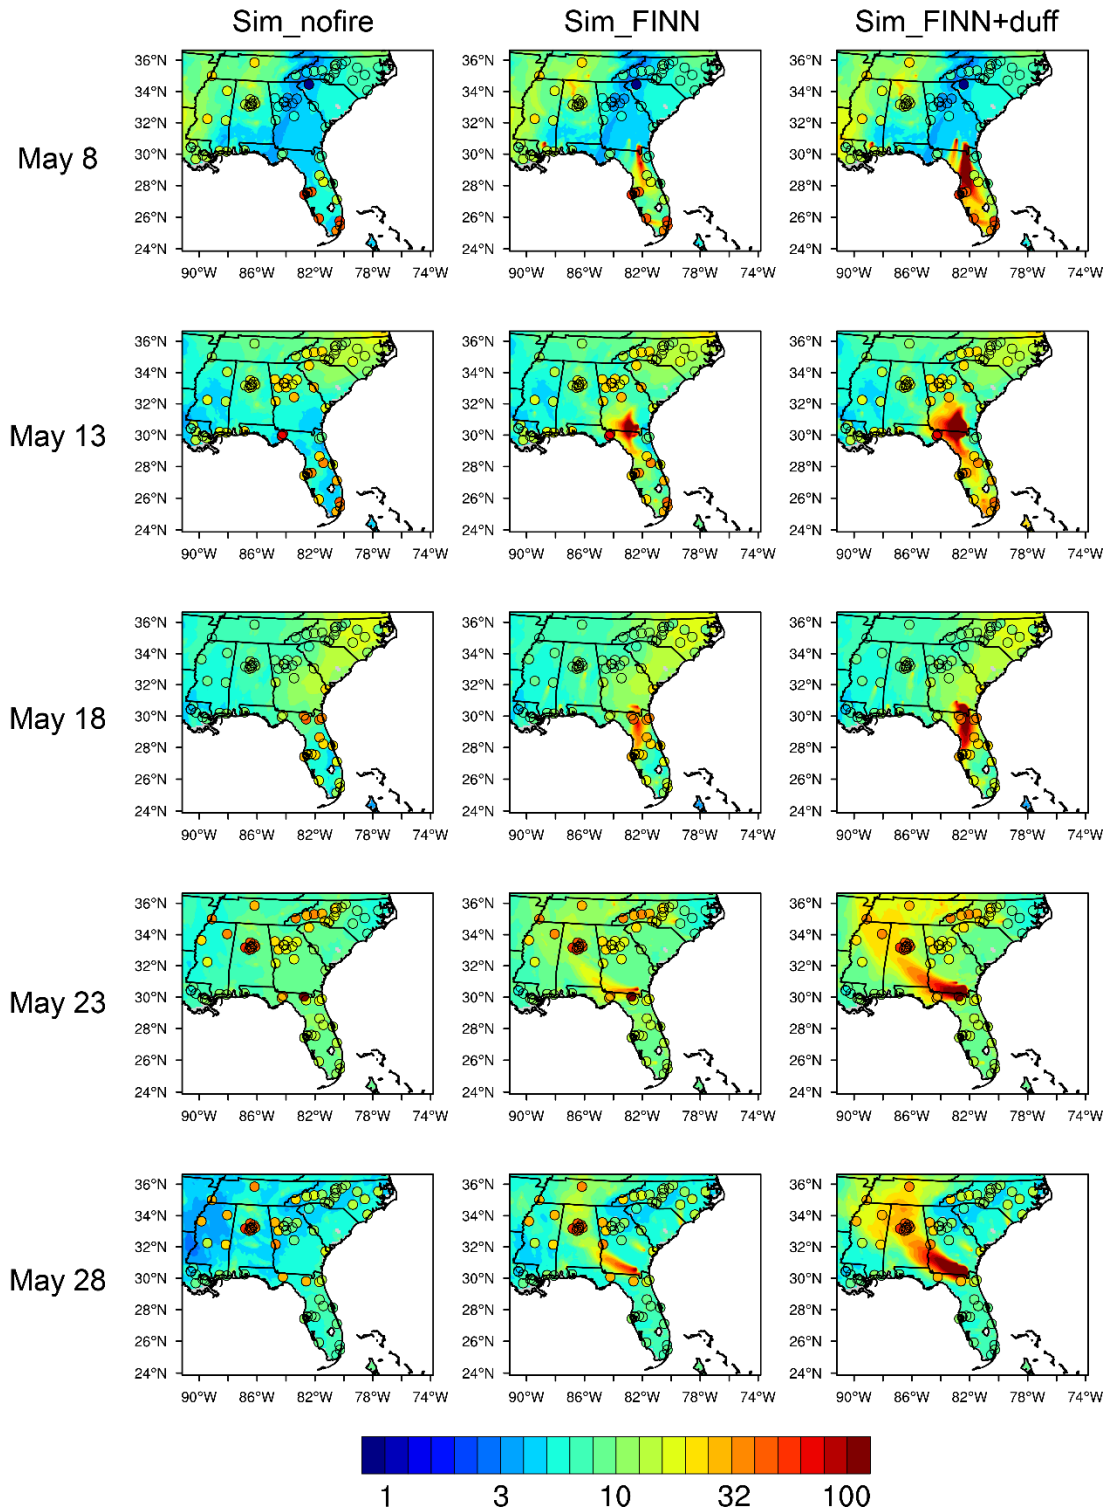

**Figure S9.** PM<sub>2.5</sub> daily mean surface concentration (µg m<sup>-3</sup>) during Oke07 simulated in sim\_nofire, sim\_FINN and sim\_FINN+duff runs. The colored scatters represent the corresponding observed PM<sub>2.5</sub> daily mean surface concentrations during the fire event.

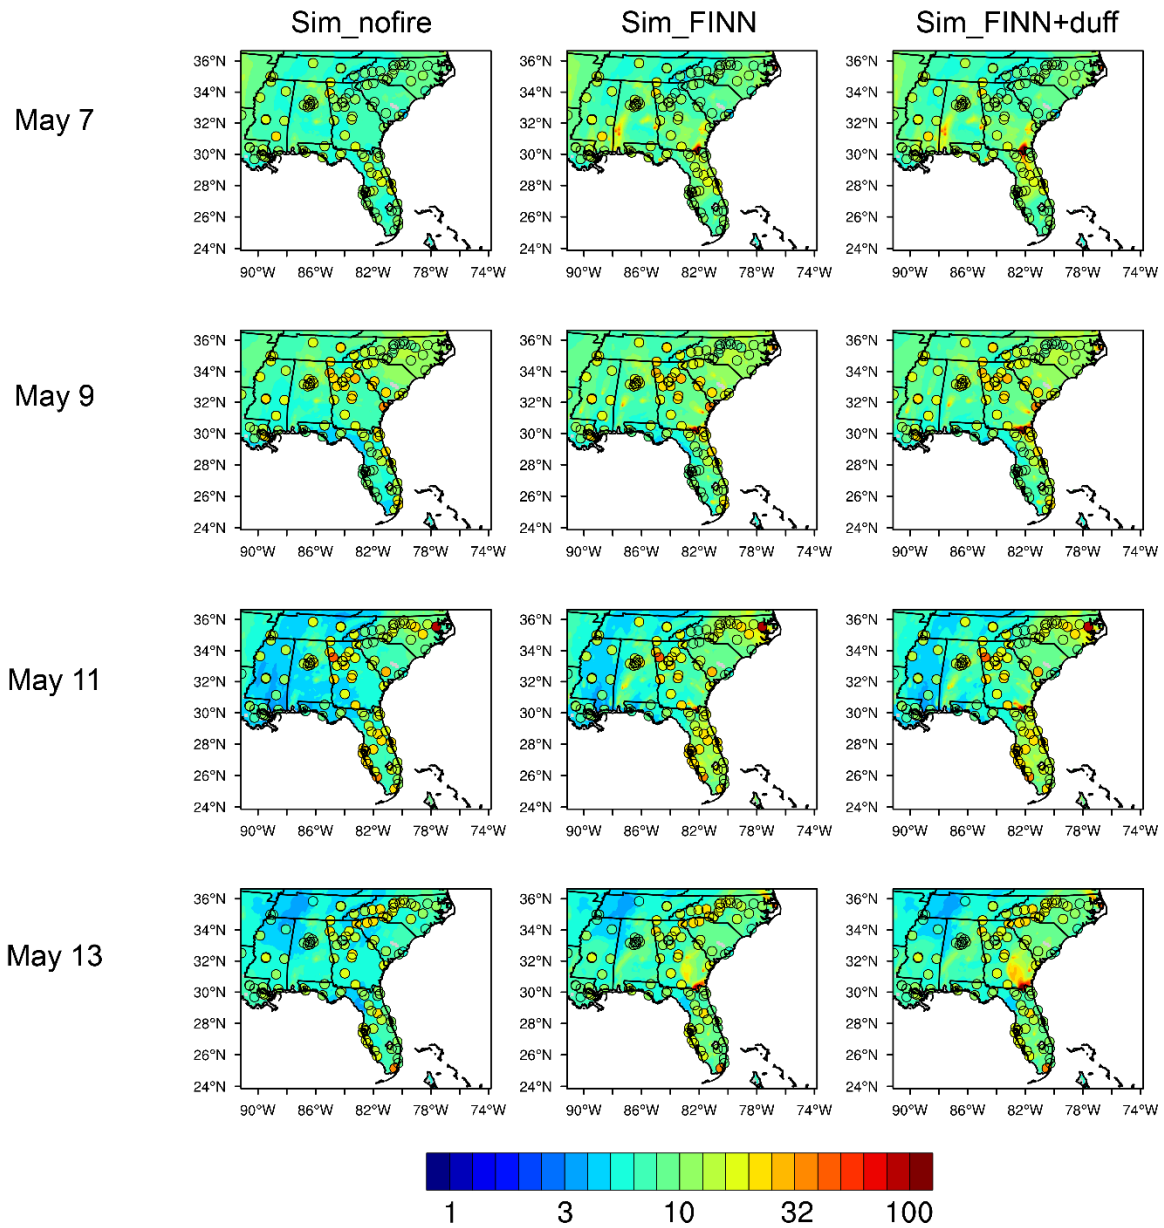

**Figure S10.** PM<sub>2.5</sub> daily mean surface concentration (µg m<sup>-3</sup>) during Oke11 simulated in sim\_nofire, sim\_FINN and sim\_FINN+duff runs. The colored scatters represent the corresponding observed PM<sub>2.5</sub> daily mean surface concentrations during the fire event.

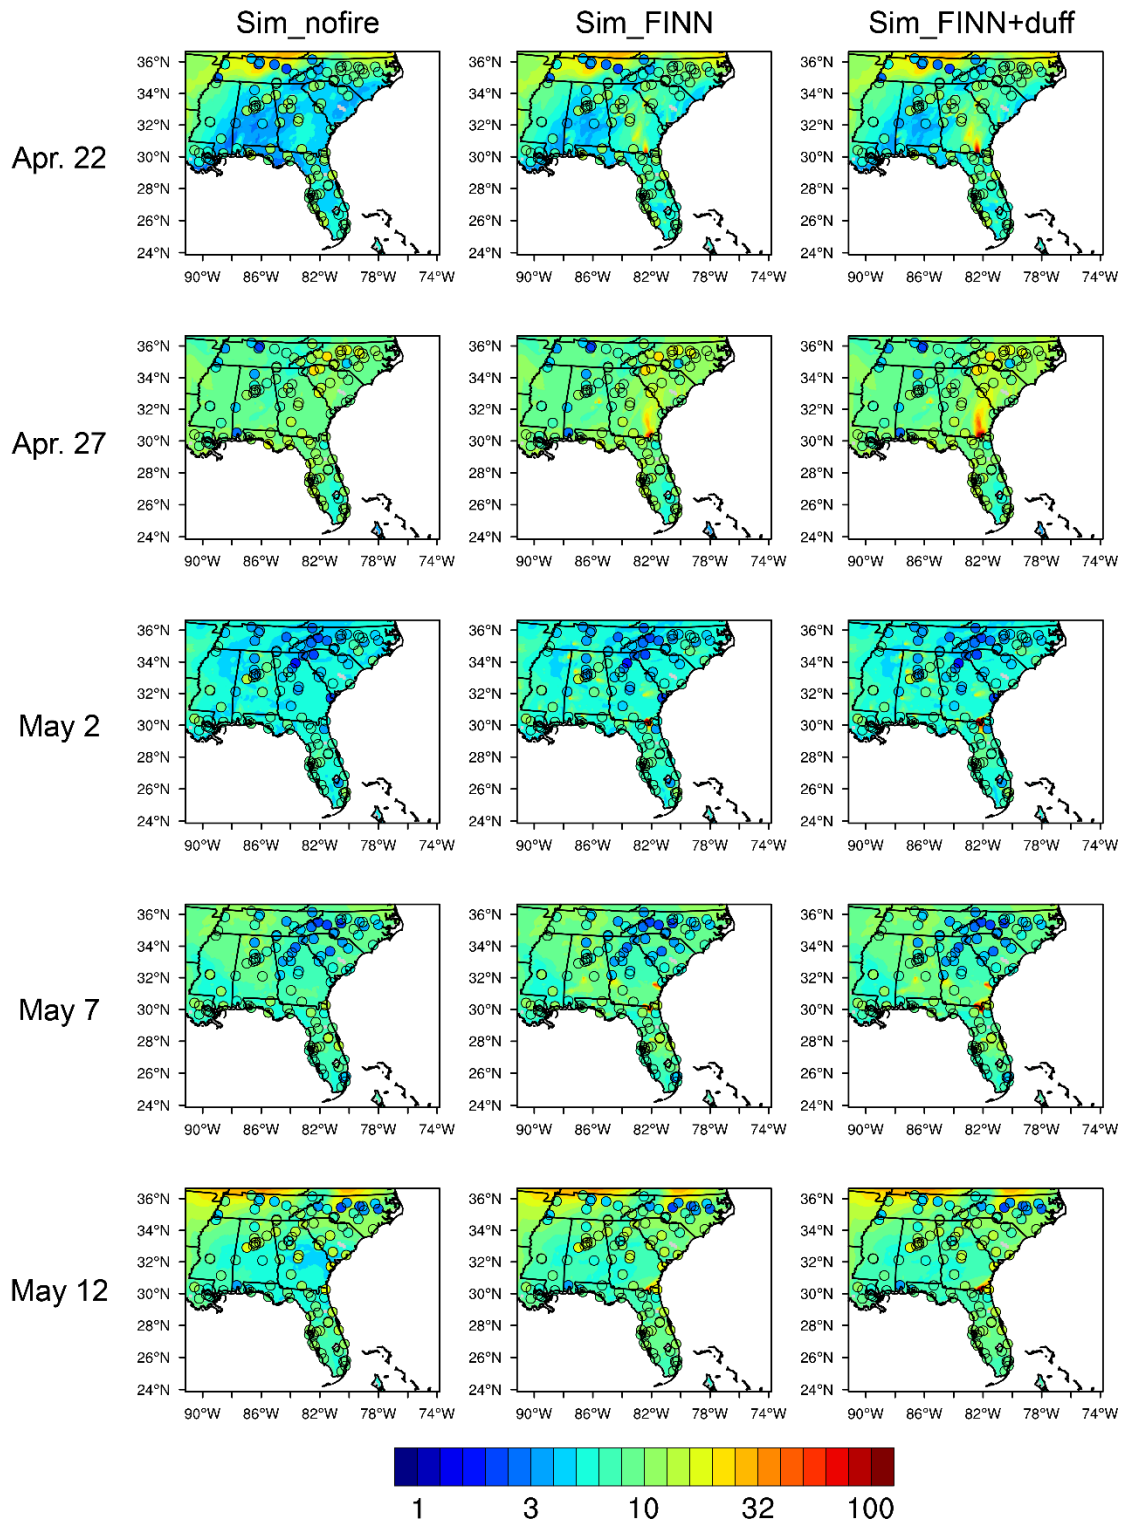

**Figure S11.** PM<sub>2.5</sub> daily mean surface concentration (µg m<sup>-3</sup>) during Oke17 simulated in sim\_nofire, sim\_FINN and sim\_FINN+duff runs. The colored scatters represent the corresponding observed PM<sub>2.5</sub> daily mean surface concentrations during the fire event.

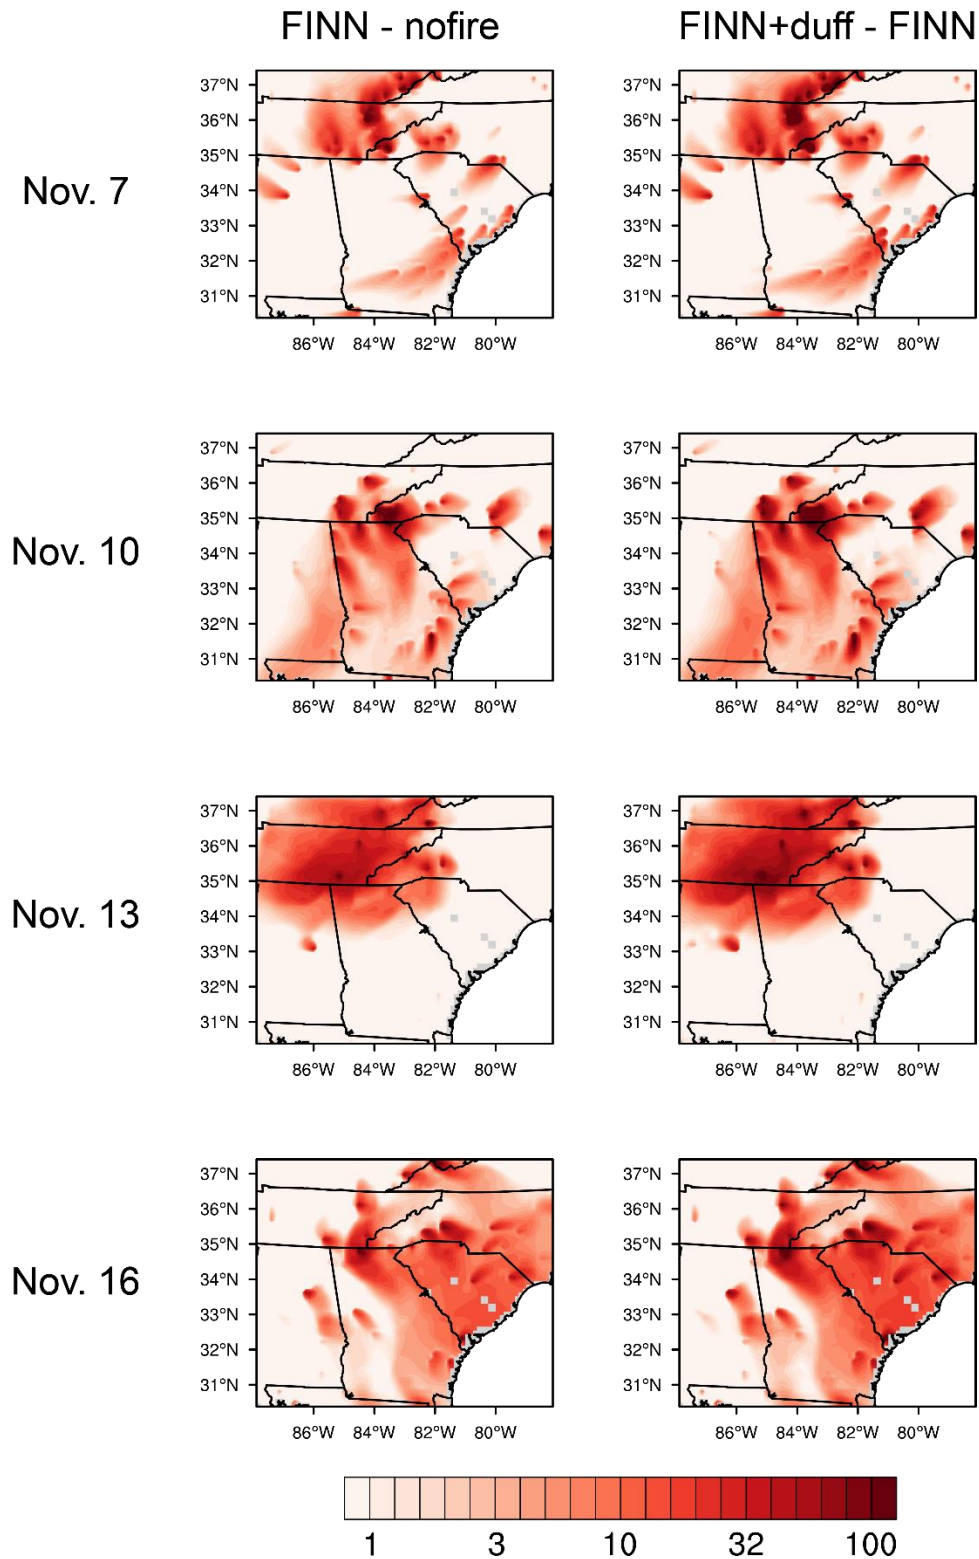

**Figure S12.** The PM<sub>2.5</sub> daily surface concentration differences (μg m<sup>-3</sup>) between sim\_FINN and sim\_nofire and between sim\_FINN+duff and sim\_FINN during App16.

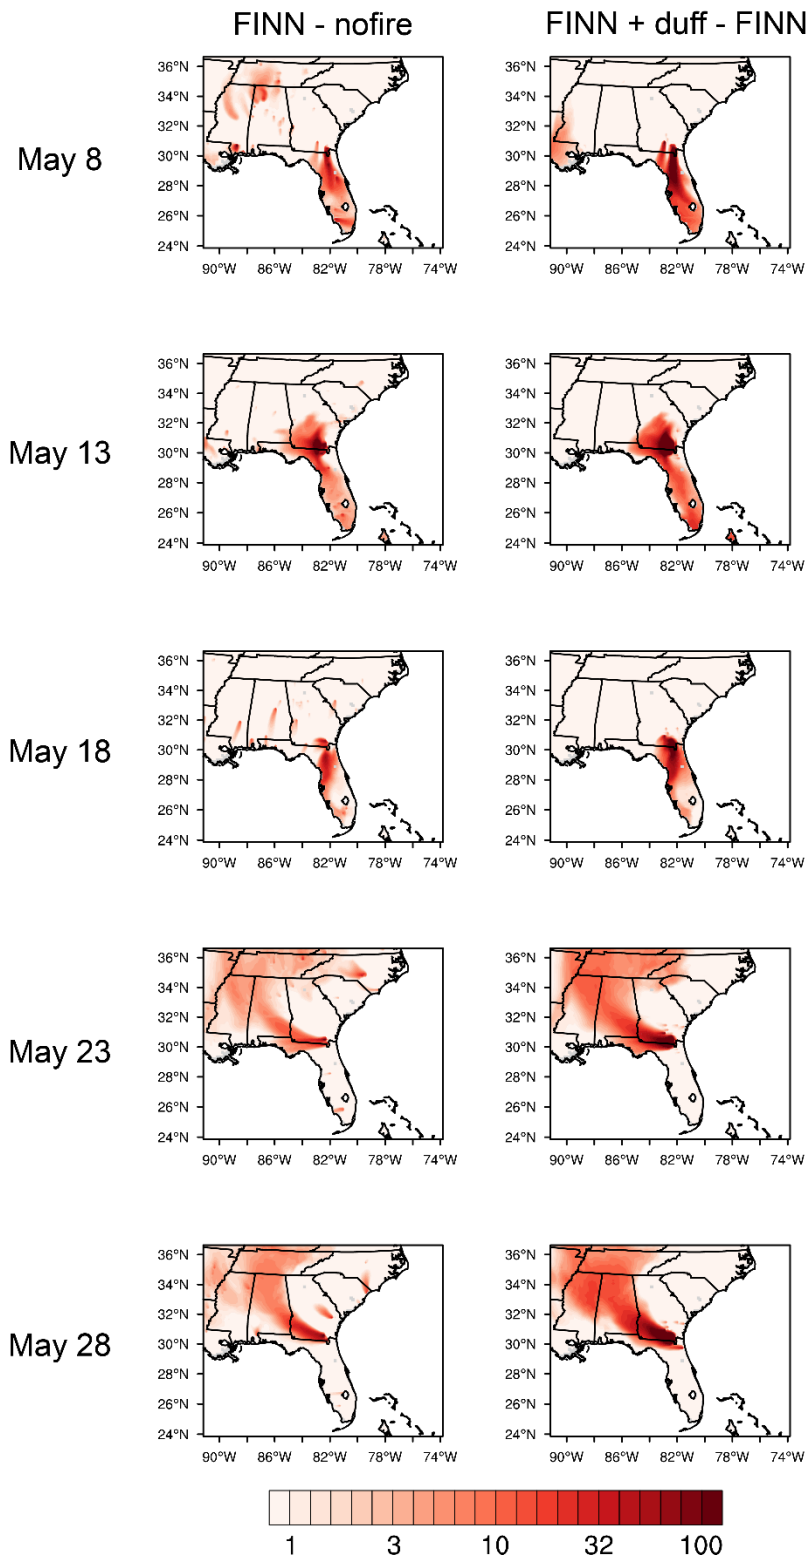

**Figure S13.** The PM<sub>2.5</sub> daily surface concentration differences ( $\mu\text{g m}^{-3}$ ) between sim\_FINN and sim\_nofire and between sim\_FINN+duff and sim\_FINN during Oke07.

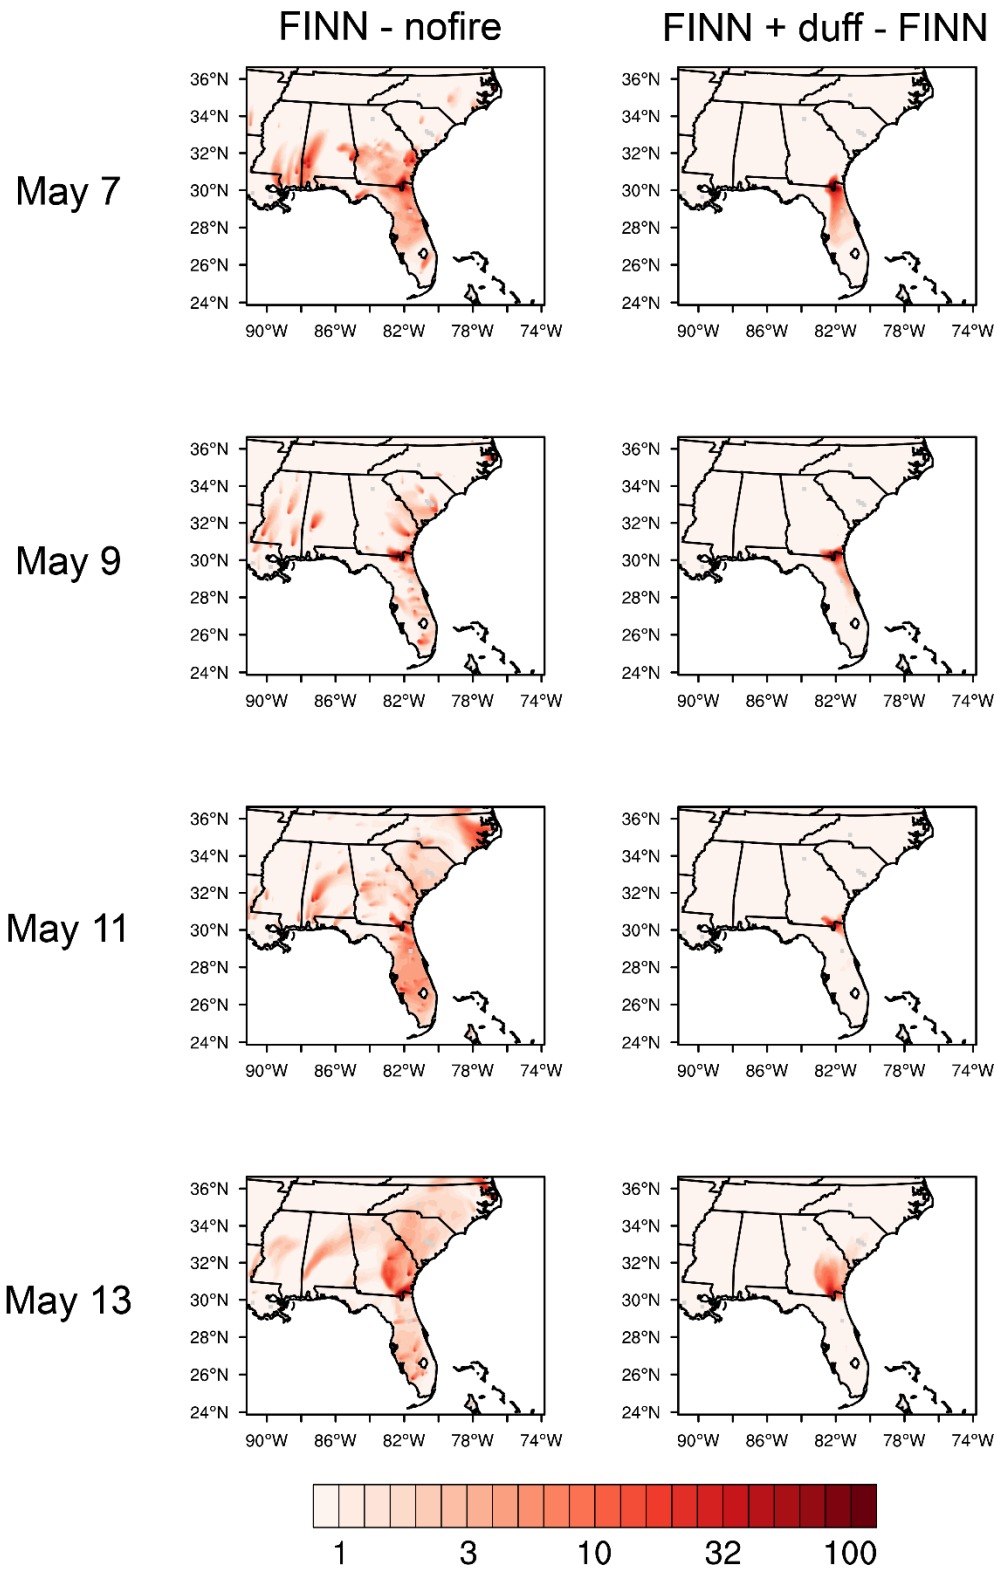

**Figure S14.** The PM<sub>2.5</sub> daily surface concentration differences ( $\mu\text{g m}^{-3}$ ) between sim\_FINN and sim\_nofire and between sim\_FINN+duff and sim\_FINN during Oke11.

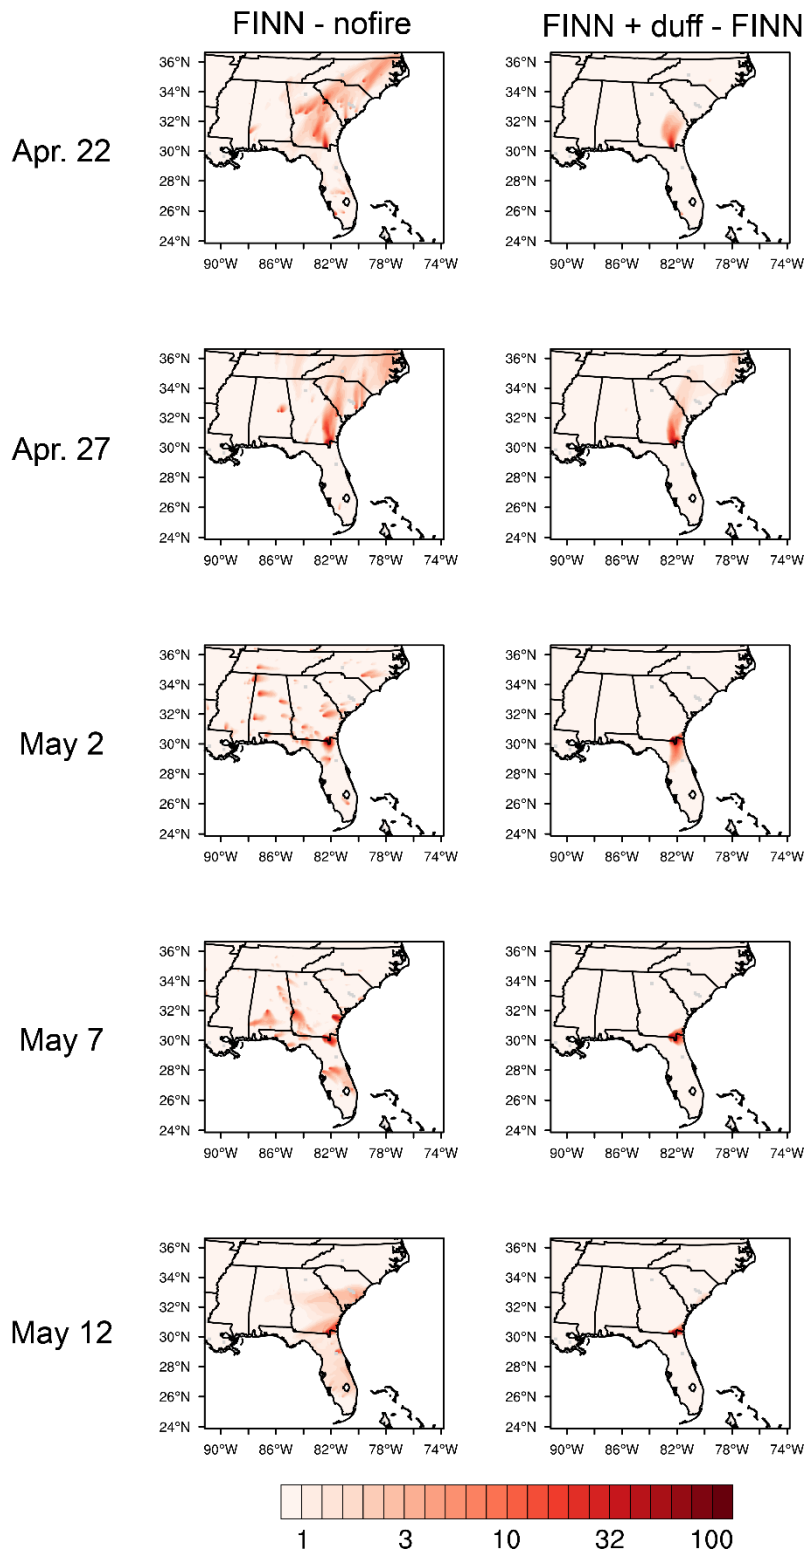

**Figure S15.** The PM<sub>2.5</sub> daily surface concentration differences ( $\mu\text{g m}^{-3}$ ) between `sim_FINN` and `sim_nofire` and between `sim_FINN+duff` and `sim_FINN` during Oke17.

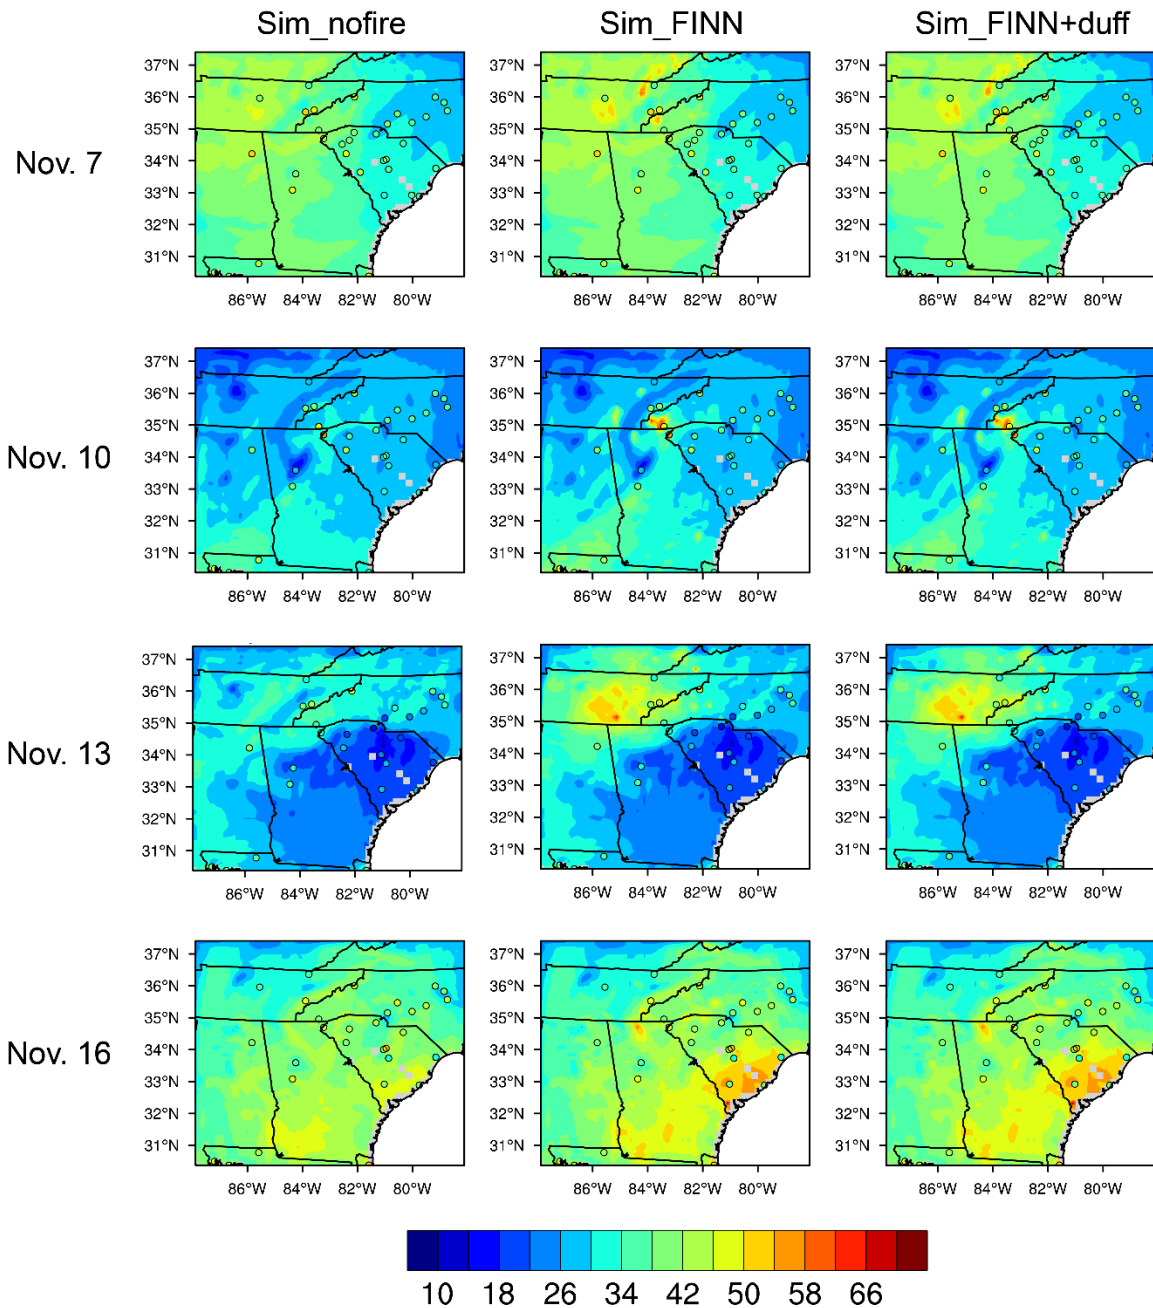

**Figure S16.** The ozone daytime surface concentration (averaged from local time 10 am to 6 pm; ppb.) during App16 simulated in sim\_nofire, sim\_FINN and sim\_FINN+duff runs. The colored scatters represent the corresponding observed Ozone daytime surface concentrations during the fire event.



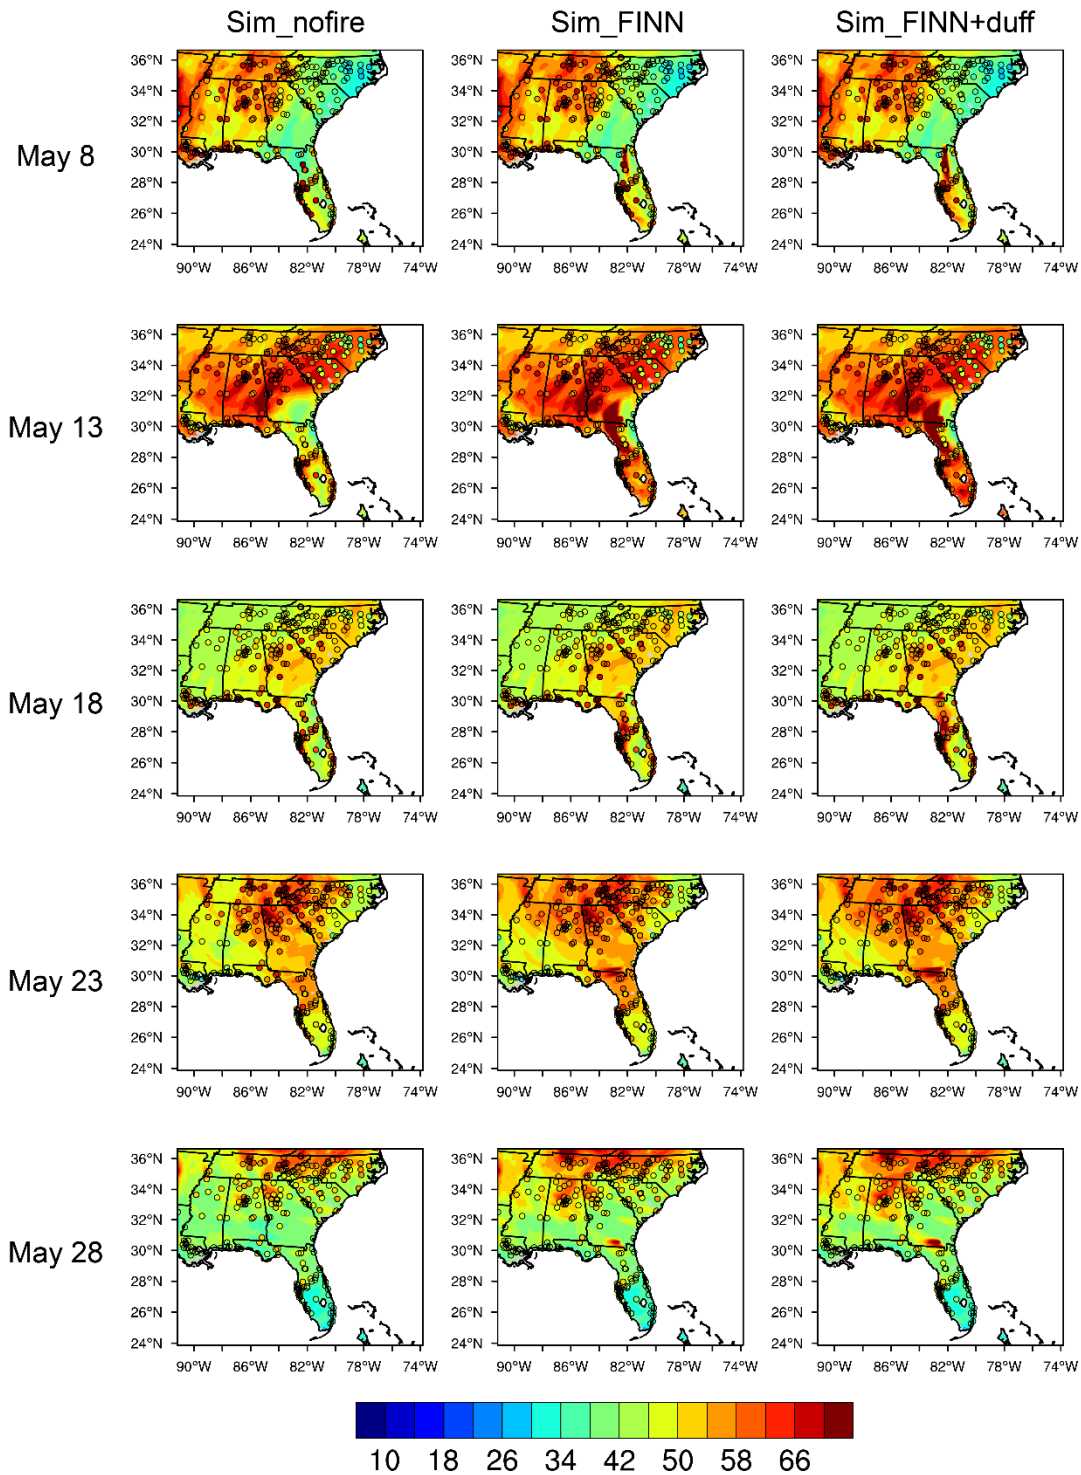

**Figure S17.** The ozone daytime surface concentration (averaged from local time 10 am to 6 pm; ppb.) during Oke07 simulated in sim\_nofire, sim\_FINN and sim\_FINN+duff runs. The colored scatters represent the corresponding observed Ozone daytime surface concentrations during the fire event.

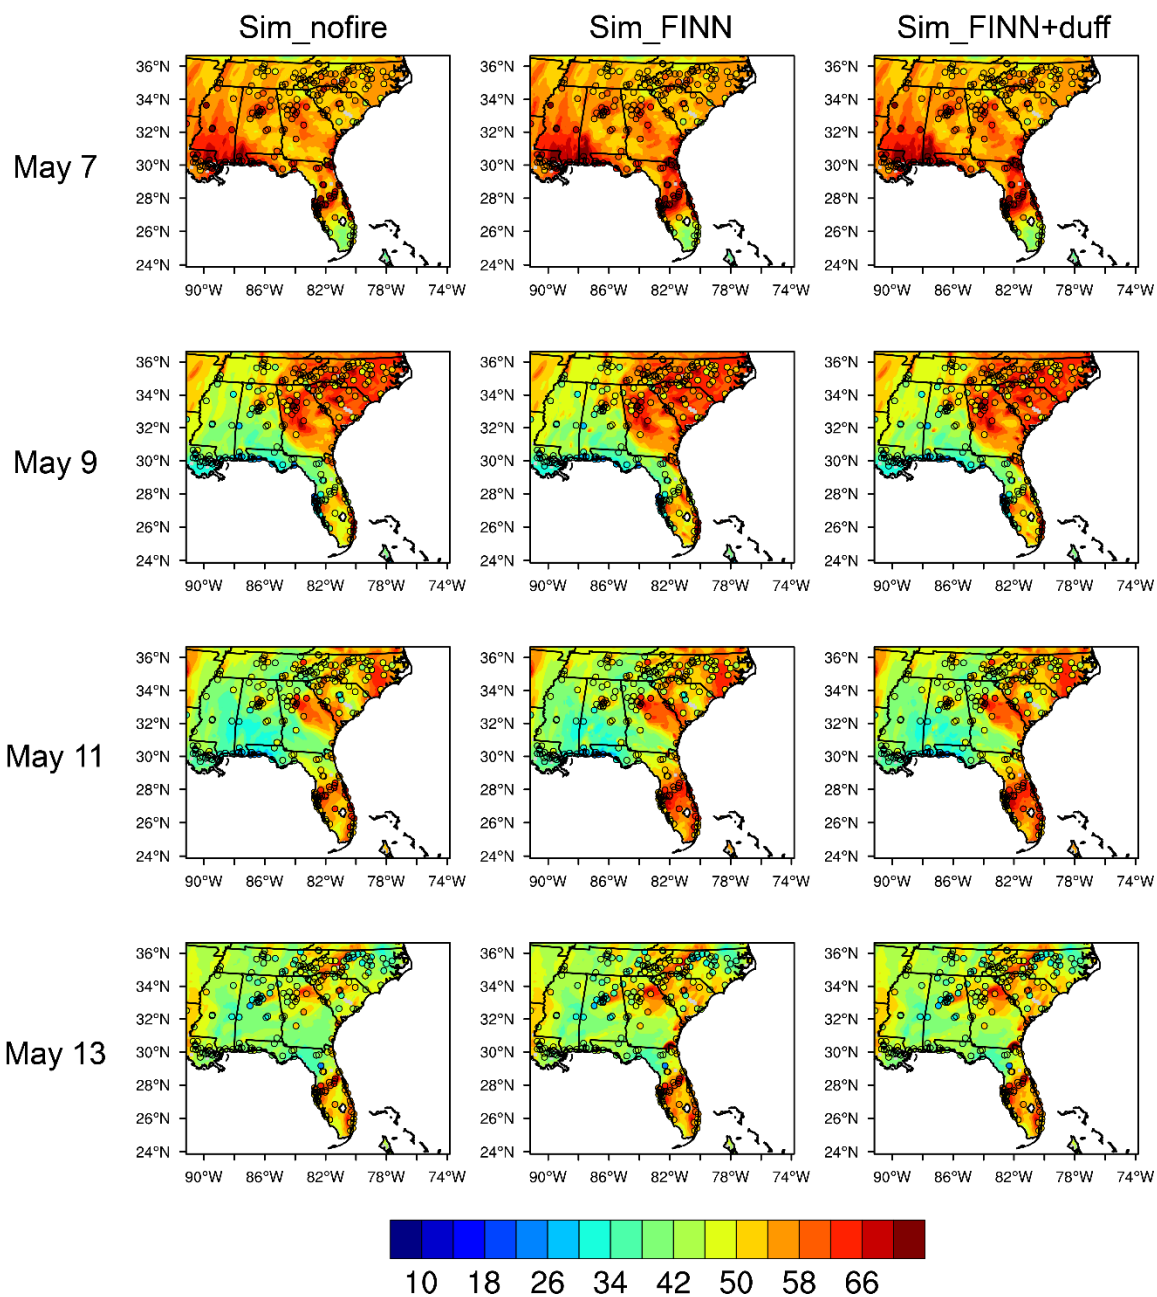

**Figure S18.** The ozone daytime surface concentration (averaged from local time 10 am to 6 pm; ppb.) during Oke11 simulated in sim\_nofire, sim\_FINN and sim\_FINN+duff runs. The colored scatters represent the corresponding observed Ozone daytime surface concentrations during the fire event.

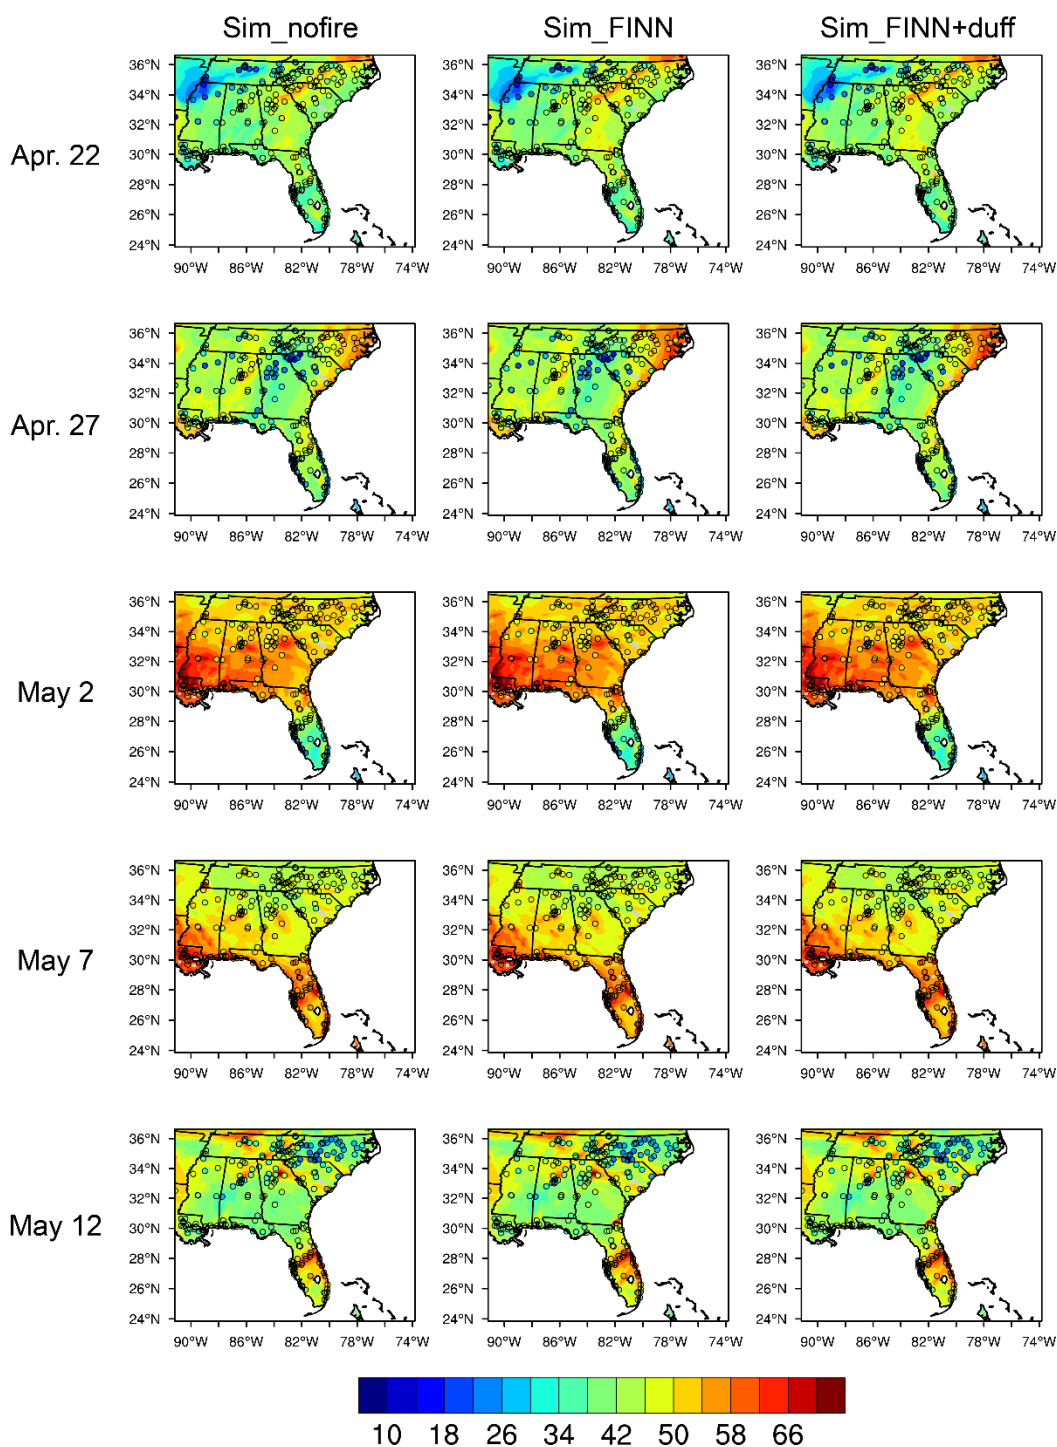

**Figure S18.** The ozone daytime surface concentration (averaged from local time 10 am to 6 pm; ppb.) during Oke17 simulated in sim\_nofire, sim\_FINN and sim\_FINN+duff runs. The colored scatters represent the corresponding observed Ozone daytime surface concentrations during the fire event.

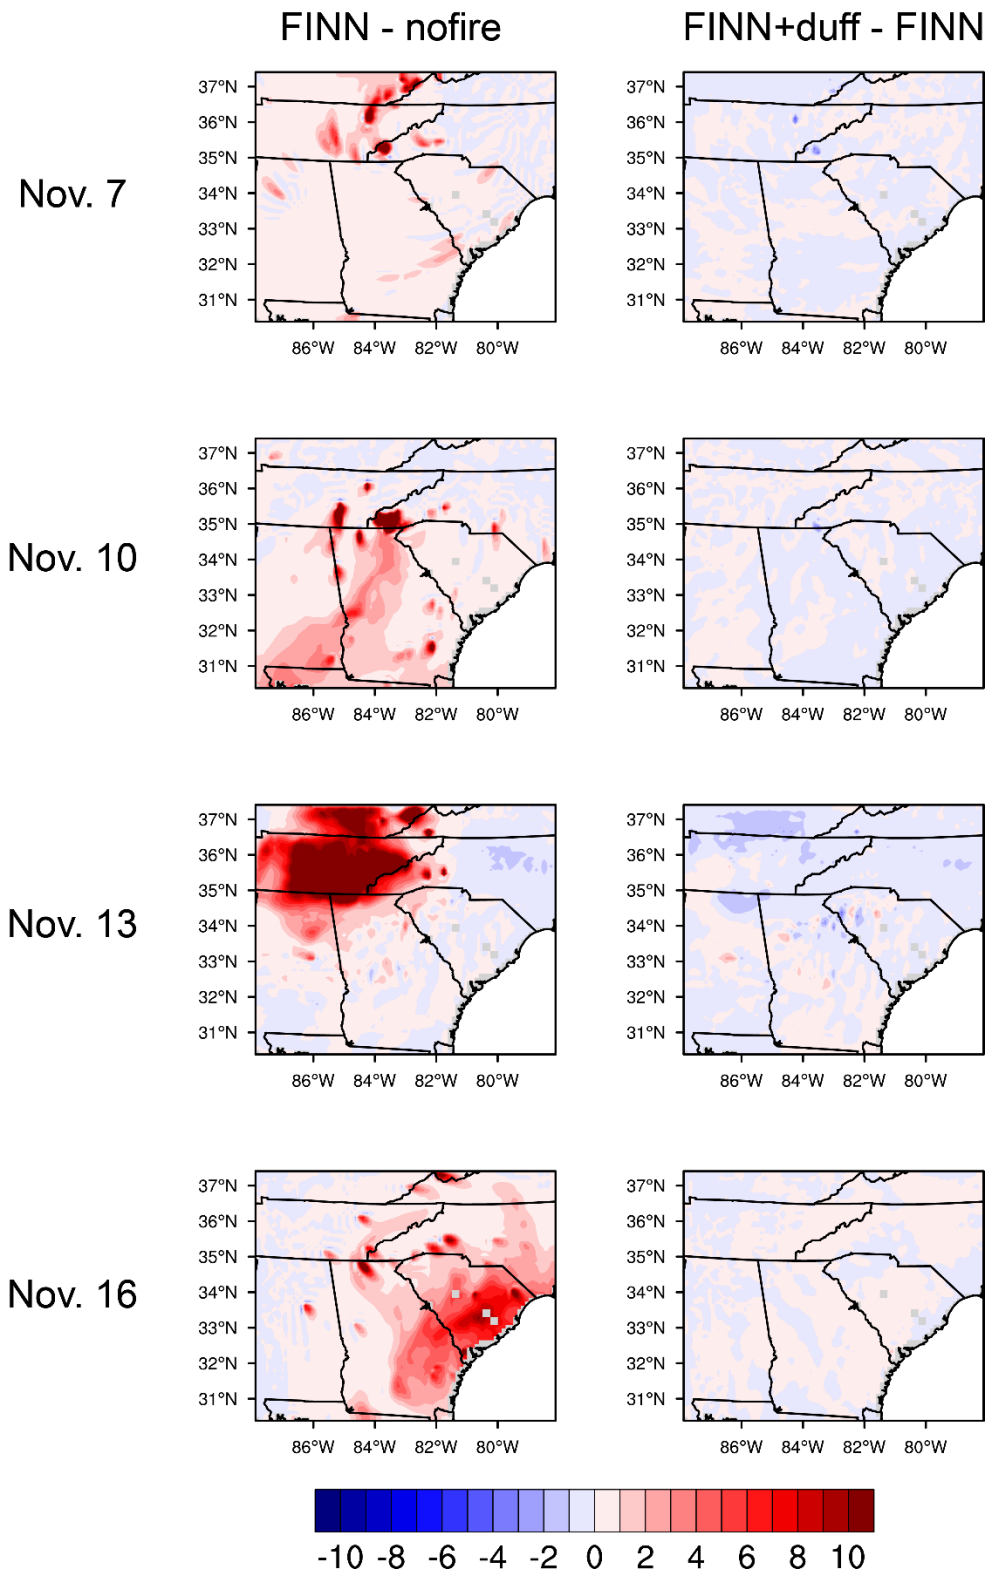

**Figure S20.** The ozone daytime surface concentration differences (ppb) between sim\_FINN and sim\_nofire and between sim\_FINN+duff and sim\_FINN during App16.

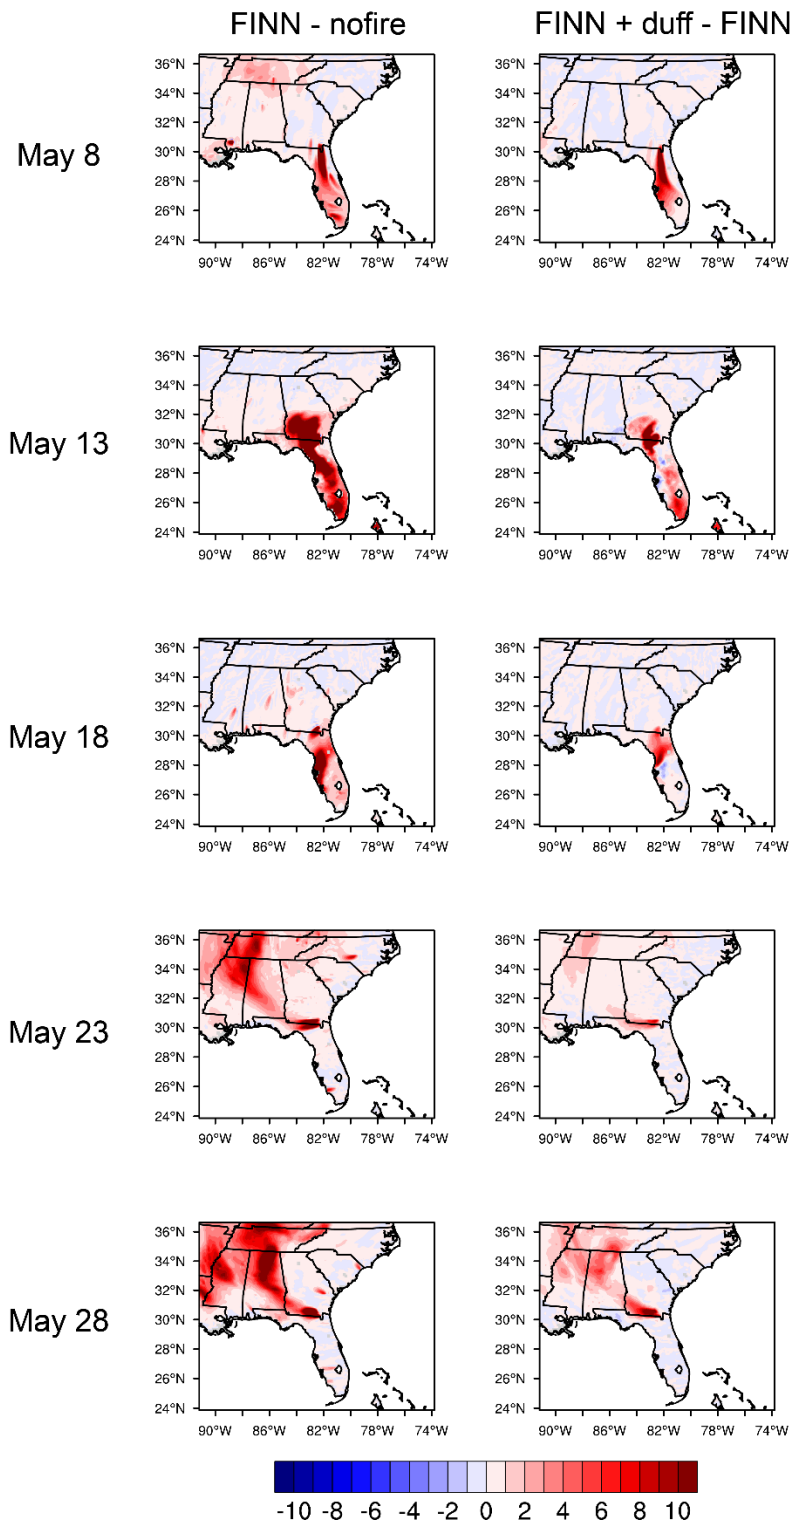

**Figure S21.** The ozone daytime surface concentration differences (ppb) between sim\_FINN and sim\_nofire and between sim\_FINN+duff and sim\_FINN during Oke07.

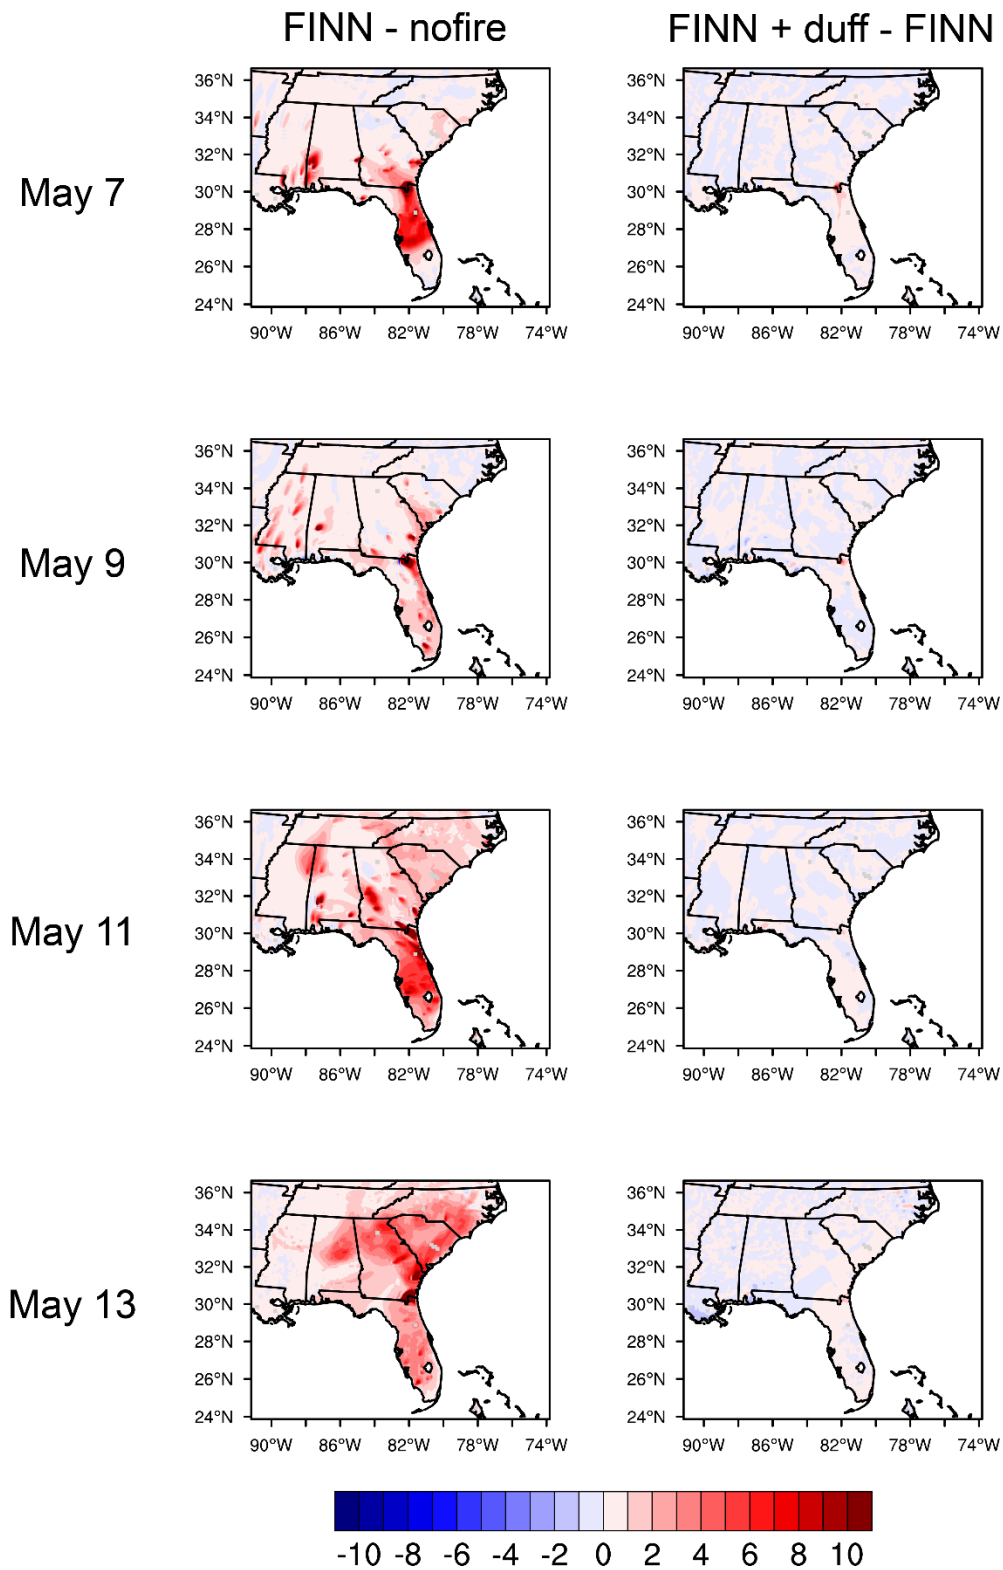

**Figure S22.** The ozone daytime surface concentration differences (ppb) between sim\_FINN and sim\_nofire and between sim\_FINN+duff and sim\_FINN during Oke11.

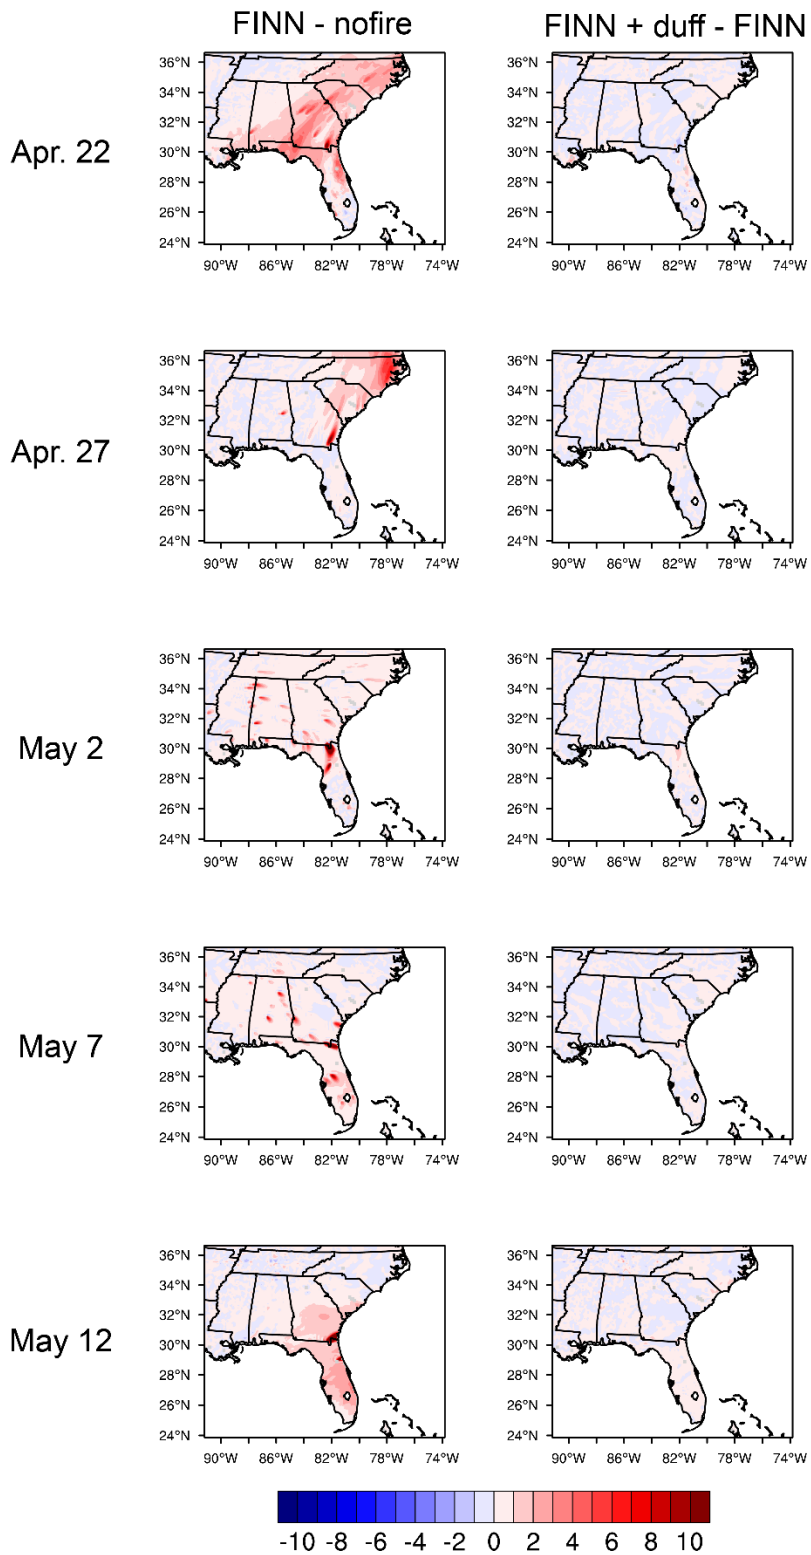

**Figure S23.** The ozone daytime surface concentration differences (ppb) between sim\_FINN and sim\_nofire and between sim\_FINN+duff and sim\_FINN during Oke17

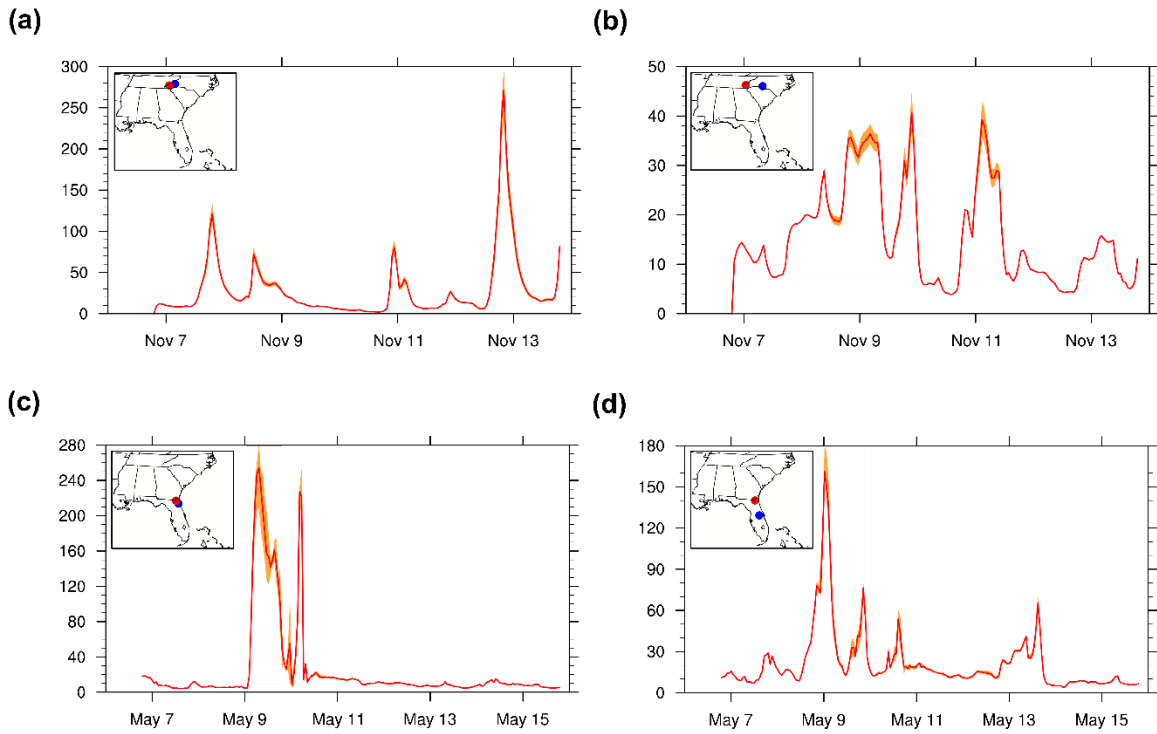

**Figure S24.** Comparisons of in-situ hourly surface PM<sub>2.5</sub> ( $\mu\text{g m}^{-3}$ ) concentrations among the observation (black) and sim\_FINN+duff (red) simulations. (a, b) App16. (c, d) Oke07. The shaded red represents the PM<sub>2.5</sub> variation from the sensitivity runs changing the duff emission by  $\pm 20\%$ . The fire location (red) and site location (blue) are shown in the map attached to each panel. The studied sites are located in (a) Buncombe county, North Carolina, (b) Fulton county, Georgia, (c) Duval county, Florida and (d) Orange county, Florida.



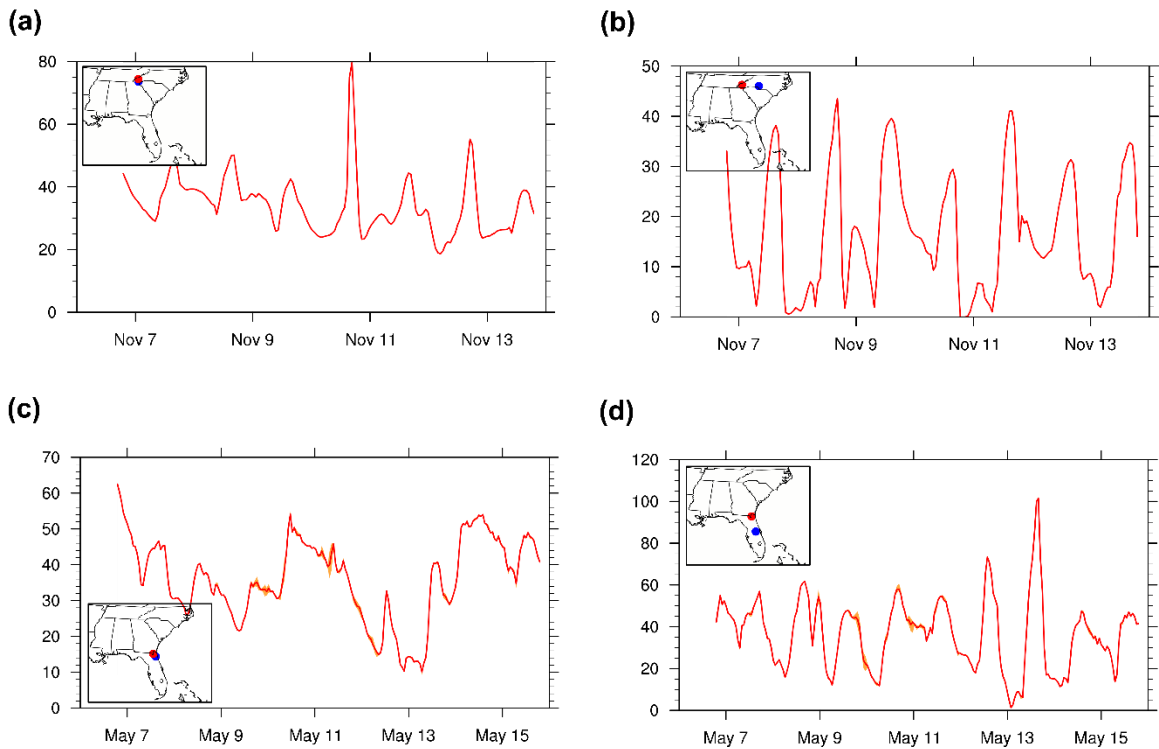

**Figure S25.** Comparisons of in-situ hourly surface ozone (ppb) concentrations among the observation (black) and sim\_FINN+duff (red) simulations. (a, b) App16. (c, d) Oke07. The shaded red represents the  $PM_{2.5}$  variation from the sensitivity runs changing the duff emission by  $\pm 20\%$ . The fire location (red) and site location (blue) are shown in the map attached to each panel. The studied sites are located in (a) Macon county, North Carolina, (b) Fulton county, Georgia, (c) Duval county, Florida and (d) Orange county, Florida.

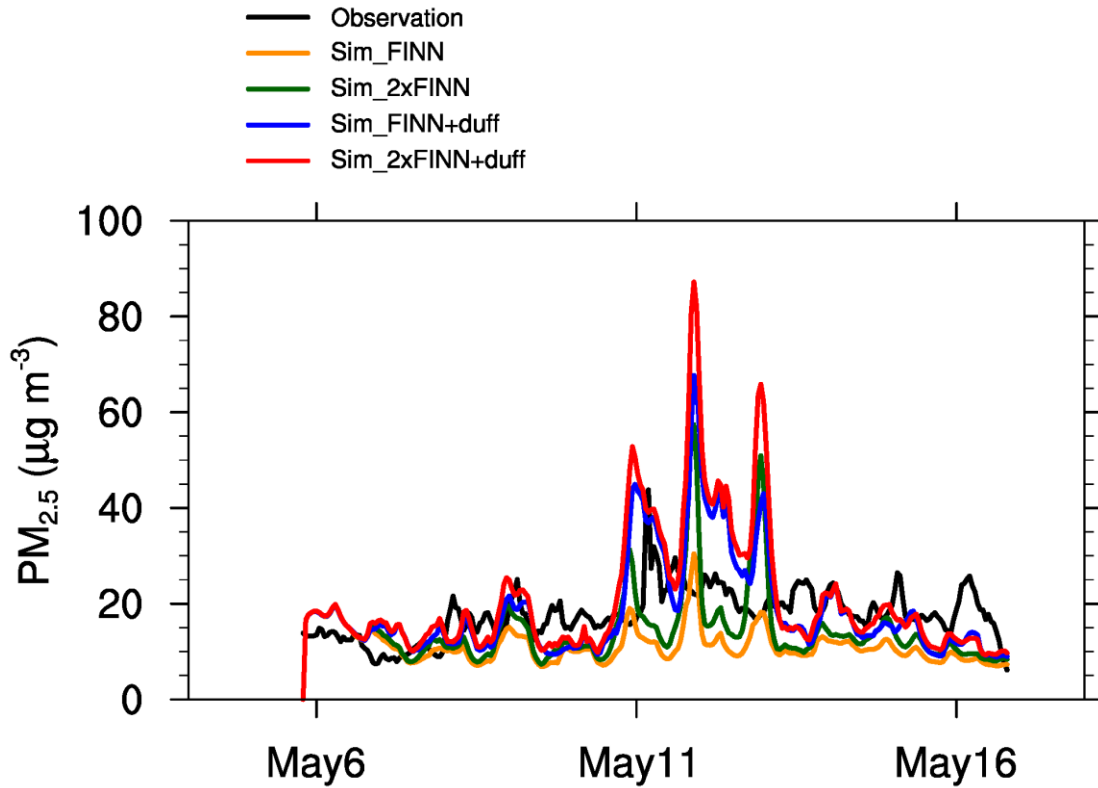

**Figure S26.** The time series of hourly surface PM<sub>2.5</sub> concentrations from May 6 – 16, 2017 in the observations, sim\_FINN, sim\_FINN+duff, and corresponding simulations with FINN emission doubled (sim\_2xFINN and sim\_2xFINN+duff) in the simulated region.

**Table S1.** Summary of previous studies of the PM emission factors of duff/peat/organic soil burnings.

| Source                   | Region          | Fuel type         | Emission Factor (g/kg) | Note                                                            |
|--------------------------|-----------------|-------------------|------------------------|-----------------------------------------------------------------|
| Geron and Hays (2013)    | Southeastern US | Peat/Organic soil | 34 - 79                | 34-79 g/kg for ground fire; 9-16 g/kg for prescribed fire       |
| Black et al. (2016)      | Southeastern US | Peat              | 7.1 and 5.9            |                                                                 |
| Benner (1977)            | Southeastern US | Peat/Organic soil | 44 ± 9                 | Total suspended particulate (TSP) is measured.                  |
| McMahon et al. (1980)    | Southeastern US | Peat              | 30 ± 20                |                                                                 |
| Urbanski (2014)          | US              | Duff/Organic soil | 50 ± 16                | Average of ground fire values by Geron and Hays (2013)          |
| Yokelson et al. (2013)   | US              | Organic soil      | 20                     | prescribed burning                                              |
| Kiely et al. (2020)      | Equatorial Asia | Peat              | 22.3                   | Summarized from previous studies, used in model simulations     |
| Roulston et al. (2018)   | Southeast Asia  | Peat              | 8 - 58                 | Average 24 g/kg; newly ignited fire has higher emission factor. |
| Jayarathne et al. (2018) | Indonesia       | Peat              | 17                     |                                                                 |
| Stockwell et al. (2016)  | Indonesia       | Peat              | 15.7-29.6              |                                                                 |
| May et al. (2014)        | Indonesia       | Peat              | 34.9                   | PM1 emission factor from lab burns                              |
| Bertschi et al. (2003)   | Africa          | Duff              | 6 - 16                 |                                                                 |
| Andreae (2019)           | Global          | Peat              | 18.9 ± 2.3             | Summarized from previous studies                                |
| Akagi et al. (2011)      | Global          | Peat              | 9.92                   | Summarized from previous studies                                |
| Giglio et al. (2013)     | Global          | Peat              | 9.1                    | Used in GFED4                                                   |

## REFERENCES

- Akagi, S., Yokelson, R. J., Wiedinmyer, C., Alvarado, M., Reid, J., Karl, T., Crouse, J., and Wennberg, P.: Emission factors for open and domestic biomass burning for use in atmospheric models, *Atmospheric Chemistry and Physics*, 11, 4039-4072, <https://doi.org/10.5194/acp-11-4039-2011>, 2011.
- Andreae, M. O.: Emission of trace gases and aerosols from biomass burning—an updated assessment, *Atmospheric Chemistry and Physics*, 19, 8523-8546, <https://doi.org/10.5194/acp-19-8523-2019>, 2019.
- Benner, W. H.: Photochemical reactions of forest fire combustion products, University of Florida, 1977.
- Bertschi, I., Yokelson, R. J., Ward, D. E., Babbitt, R. E., Susott, R. A., Goode, J. G., and Hao, W. M.: Trace gas and particle emissions from fires in large diameter and belowground biomass fuels, *Journal of Geophysical Research: Atmospheres*, 108, 2003.
- Black, R. R., Aurell, J., Holder, A., George, I. J., Gullett, B. K., Hays, M. D., Geron, C. D., and Tabor, D.: Characterization of gas and particle emissions from laboratory burns of peat, *Atmospheric Environment*, 132, 49-57, 2016.
- Geron, C., and Hays, M.: Air emissions from organic soil burning on the coastal plain of North Carolina, *Atmospheric environment*, 64, 192-199, <https://doi.org/10.1016/j.atmosenv.2012.09.065>, 2013.
- Giglio, L., Randerson, J. T., and Werf, G. R.: Analysis of daily, monthly, and annual burned area using the fourth-generation global fire emissions database (GFED4), *Journal of Geophysical Research: Biogeosciences*, 118, 317-328, <https://doi.org/10.1002/jgrg.20042>, 2013.
- Jayarathne, T., Stockwell, C. E., Gilbert, A. A., Daugherty, K., Cochrane, M. A., Ryan, K. C., Putra, E. I., Saharjo, B. H., Nurhayati, A. D., and Albar, I.: Chemical characterization of fine particulate matter emitted by peat fires in Central Kalimantan, Indonesia, during the 2015 El Niño, *Atmospheric Chemistry and Physics*, 18, 2585-2600, 2018.
- Kiely, L., Spracklen, D. V., Wiedinmyer, C., Conibear, L. A., Reddington, C. L., Arnold, S. R., Knote, C., Khan, M. F., Latif, M. T., and Syaufina, L.: Air quality and health impacts of vegetation and peat fires in Equatorial Asia during 2004–2015, *Environmental Research Letters*, <https://doi.org/10.1088/1748-9326/ab9a6c>, 2020.
- May, A., McMeeking, G., Lee, T., Taylor, J., Craven, J., Burling, I., Sullivan, A., Akagi, S., Collett Jr, J., and Flynn, M.: Aerosol emissions from prescribed fires in the United States: A synthesis of laboratory and aircraft measurements, *Journal of Geophysical Research: Atmospheres*, 119, 11,826-811,849, 2014.
- McMahon, C. K., Wade, D. D., and Tsoukalas, S. N.: Combustion characteristics and emissions from burning organic soils, In: 73rd Annual Meeting of the Air Pollution Control Association. Montreal, Quebec: June 22-27, 1980. 2-16., 1980, 2-16.
- Roulston, C., Paton-Walsh, C., Smith, T., Guérette, É. A., Evers, S., Yule, C. M., Rein, G., and Van der Werf, G.: Fine particle emissions from tropical peat fires decrease rapidly with time since ignition, *Journal of Geophysical Research: Atmospheres*, 123, 5607-5617, <https://doi.org/10.1029/2017JD027827>, 2018.
- Stockwell, C. E., Jayarathne, T., Cochrane, M. A., Ryan, K. C., Putra, E. I., Saharjo, B. H., Nurhayati, A. D., Albar, I., Blake, D. R., and Simpson, I. J.: Field measurements of trace gases and aerosols emitted by peat fires in Central Kalimantan, Indonesia, during the 2015 El Niño, *Atmospheric Chemistry and Physics*, 16, 11711-11732, 2016.

Urbanski, S.: Wildland fire emissions, carbon, and climate: Emission factors, *Forest Ecology and Management*, 317, 51-60, <https://doi.org/10.1016/j.foreco.2013.05.045>, 2014.

Yokelson, R. J., Burling, I., Gilman, J., Warneke, C., Stockwell, C., Gouw, J. d., Akagi, S., Urbanski, S., Veres, P., and Roberts, J.: Coupling field and laboratory measurements to estimate the emission factors of identified and unidentified trace gases for prescribed fires, *Atmospheric Chemistry and Physics*, 13, 89-116, 2013.
